# Supplementary material for: Comprehensive Catalog of Variants Potentially Associated with Hidradenitis Suppurativa, Including Newly Identified Variants from a Cohort of 100 Patients
Source: Preprints.org preprint supplement (doi:10.20944/preprints202408.0431.v1), 2024-08-07
Supplement: Supplementary file 1 [file supplementary]

## Supplementary Figures & Tables :

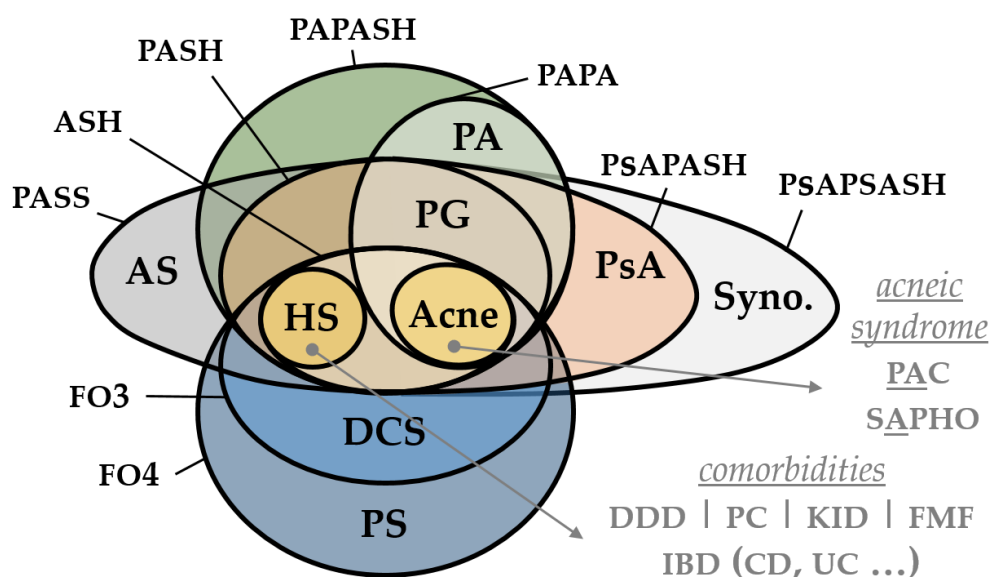

**Supp. Figure 1.** Comorbidities of HS and its involvement in various autoinflammatory syndromes [1–5]. Diseases and syndromes: AS: ankylosing spondylitis; ASH: acne, hidradenitis suppurativa; CD: Crohn's disease; DCS: dissecting cellulitis of the scalp; DDD: Dowling-Degos disease; FMF: familial Mediterranean fever; FO3: follicular occlusion triad (hidradenitis suppurativa, acne conglobata, dissecting cellulitis of the scalp); FO4: follicular occlusion tetrad (hidradenitis suppurativa, acne conglobata, dissecting cellulitis of the scalp and pilonidal sinus); HS: hidradenitis suppurativa; IBD: inflammatory bowel disease; KID: keratitis, ichthyosis, deafness; PA: pyogenic arthritis; PAC: pyoderma gangrenosum, acne, ulcerative colitis; PAPA: pyogenic arthritis, pyoderma gangrenosum, acne; PASH: pyoderma gangrenosum, acne, hidradenitis suppurativa; PAPASH: pyogenic arthritis, pyoderma gangrenosum, acne, hidradenitis suppurativa; PASS: pyoderma gangrenosum, acne, hidradenitis suppurativa, ankylosing spondylitis; PC: pachyonychia congenita; PG: pyoderma gangrenosum; PS: pilonidal sinus; PsA: psoriatic arthritis; PsAPASH: psoriatic arthritis, pyoderma gangrenosum, acne, hidradenitis suppurativa; SAPHO: synovitis, acne, pustulosis, hyperostosis, osteitis; Syno.: synovitis; UC: ulcerative colitis.

\*\*\*

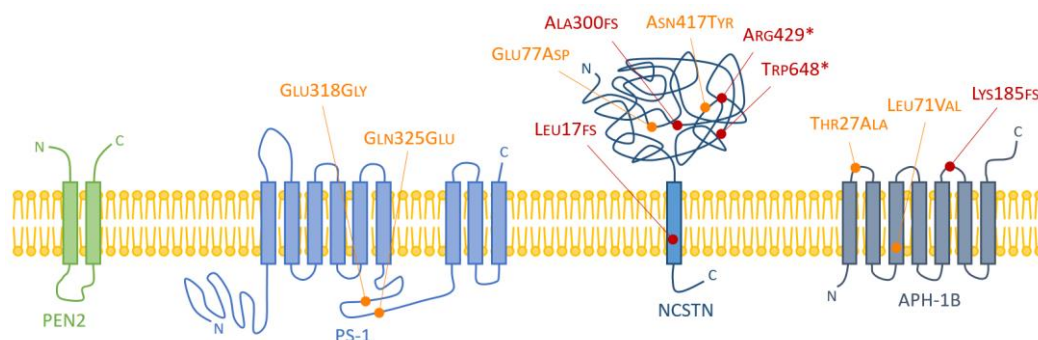

**Supplementary Figure 2.** All  $\gamma$ -secretase exonic variants identified in our HS1 & HS2 cohorts. In orange and red, variants with moderate and strong impacts. FS: frameshift variant; \*: nonsense variant.

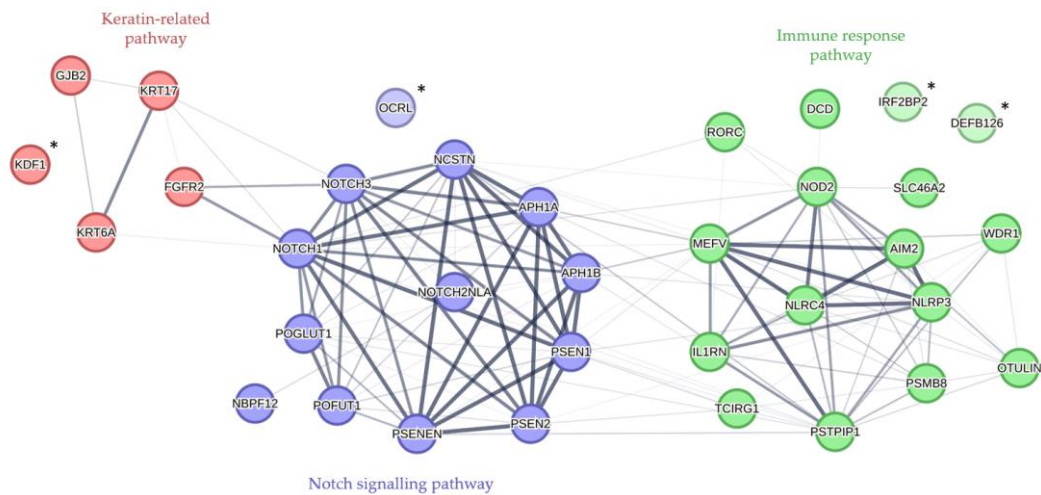

**Supplementary Figure 3.** Protein network of all genes discussed in this article, according to STRING (v. 12.0). Three clusters are identified: the Notch signalling pathway, the immune response pathway and keratinization (consistent with Jfri *et al.* [6]). The interaction score is set to 0.150 to enhance sensitivity over specificity. The thicker the edges, the stronger the connections within the clusters. (\*) indicates genes not connected to the network but guilt-by-association [7–9].

\*\*\*

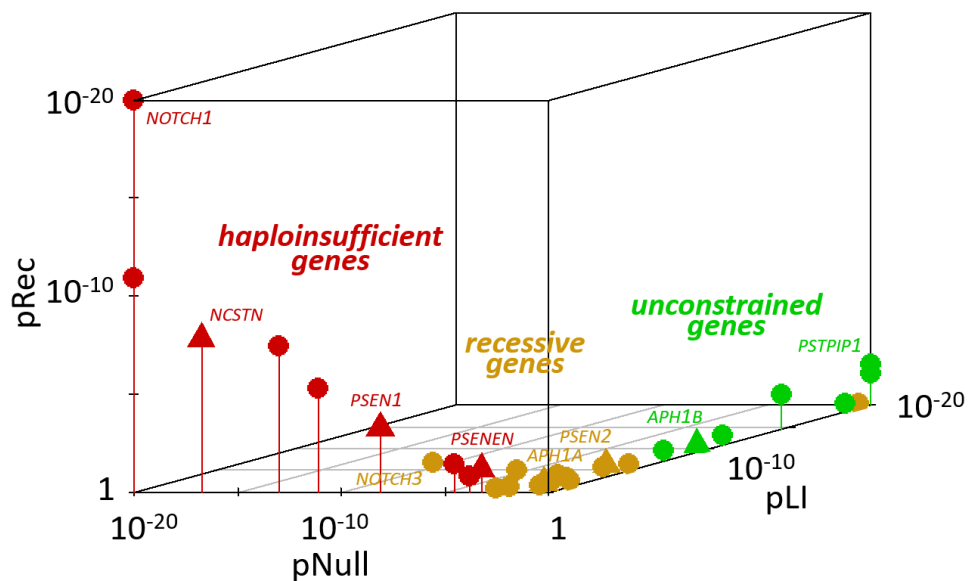

**Supplementary Figure 4.** Distribution of pLI (probability of intolerance to loss of function), pRec (probability of being recessive) and pNull (probability of being unconstrained) gene scores. Scores were obtained from the gnomAD (v4.1) database. Extreme values are capped to  $10^{-20}$  to enhance the readability of the figure. The triangles (▲) and circles (●) correspond to the genes of the  $\gamma$ -secretase complex and other genes mentioned in this review, respectively. From left to right, the genes subject to haploinsufficiency (in red) are: *NOTCH1*, *FGFR2*, *NCSTN*, *SOX9*, *RORC*, *PSEN1*, *KLF5*, *PSENEN*, and *KDF1*.

**Supplementary Table 2.** Example of a mutation presented in 9 distinct articles.

| Article                | MANE Transcript                          | Exon     | Genome | Position    | c.HGVS           | p.HGVS             |
|------------------------|------------------------------------------|----------|--------|-------------|------------------|--------------------|
| [10]                   | <b>NM_001290184</b>                      | <b>4</b> | -      | -           | <b>c.218delC</b> | <b>p.P73Lfs*15</b> |
| [11]                   | <b>NM_015331</b>                         | <b>3</b> | -      | -           | <b>c.278delC</b> | <b>p.P93Lfs*15</b> |
| [12]                   | -                                        | -        | -      | -           | c.218delC        | -                  |
| [13]                   | -                                        | 4        | -      | -           | c.218delC        | p.P73Lfs*15        |
| [14]                   | -                                        | -        | -      | -           | c.218delC        | p.I73Tfs*3         |
| [15]                   | -                                        | -        | -      | -           | c.218delC        | p.P73Lfs*15        |
| [16]                   | -                                        | 4        | -      | -           | c.218delC        | p.P73Lfs*15        |
|                        | -                                        | -        | -      | -           | c.278delC        | p.P93Lfs*15        |
| [17]                   | -                                        | 3        | -      | -           | c.218delC        | p.P93Lfs*15        |
|                        | -                                        | 3        | -      | -           | c.278delC        | p.P93Lfs*15        |
| [18]                   | -                                        | -        | -      | -           | c.218delC        | p.P73Lfs*15        |
|                        | -                                        | -        | -      | -           | c.278delC        | p.P93Lfs*15        |
| <i>Current article</i> | <i>ENST000000294785</i><br>(= NM_015331) | 3        | GRCh38 | 1:160349086 | c.278delC        | p.P93Lfs*15        |

The first two lines in **bold** represent the two original articles from 2018 reporting first this mutation. The dashes indicate missing data that would have been helpful for tracking the mutation over the past five years. This example illustrates a deletion in *NCSTN* described simultaneously in 2018 in two independent articles and in different patients. The annotations differ: the first laboratory reports a c.218delC mutation (p.P73Lfs\*15) on the NM\_001290184 transcript affecting exon 4 [35] while the second laboratory reports a c.278delC mutation (p.P93Lfs\*15) on the NM\_015331 transcript affecting exon 3 [34]. Although both annotations are technically correct, they initially appear to describe distinct mutations. However, subsequent reviews have removed the transcript details, altered the protein HGVS code (p.P73Lfs\*15 → p.I73Tfs\*3 → p.P93Lfs\*15), introduced new errors regarding the exon (4 → 3), and included the mutations separately, despite them being the same mutation. This highlights the importance of clarifying such details, always specifying the reference transcript (preferably using the standard MANE transcript) or at least the genome version and variant position. Errors are common in such catalogs, and we hope this revised version will facilitate future research on HS.

**Supplementary Table 3.** Additional polymorphisms in other genes associated with HS (78) in the literature, including the two new variants identified in our cohort

| Gene                           | ID   | Position (GRCh38)     | Ex.   | c/p.HGVS      | Eff.    | rsID         | R. | Or.         | F/S | Asso.                |
|--------------------------------|------|-----------------------|-------|---------------|---------|--------------|----|-------------|-----|----------------------|
| AIM2<br>(ENST00000368130)      | 100  | 1:159076820           | 5'UTR | -208A>C       | –       | rs41264459   | 0  | IT          | S   | (PA)PASH SAPHO       |
| DCD<br>(ENST00000293371)       | 101  | 12:54645237           | 4     | p.A76Sfs*21   | fs      | rs538180888  | 0  | IT          | F   | –                    |
| DEFB126<br>(ENST00000382398)   | 102  | 20:145459             | 2     | p.K35*        | non     | rs142956939  | 0  | div.        | F   | –                    |
| FGFR2<br>(ENST00000358487)     | 103  | 10:121565644          | 3     | p.S57L        | mis     | rs56226109   | 0  | div.        | –   | –                    |
|                                | 104  | 10:121551422          | 5     | p.K164N       | mis     | –            | 2  | GB*         | F   | AC Com               |
| GJB2<br>(ENST00000382848)      | 105  | 13:20189548           | 2     | p.G12R        | mis     | rs104894408  | 0  | US* IT*     | S   | KID FO3              |
|                                | 106° | 13:20189552           | 2     | p.G12Vfs*2    | fs      | rs80338939   | 1  | IT* FR*     | S   | PASH                 |
|                                | 107° | 13:20189503           | 2     | p.V27I        | mis     | rs2274084    | 0  | JP-AfUS FR* | S   | KID FO3              |
|                                | 108  | 13:20189463           | 2     | p.A40V        | mis     | –            | 1  | US* IT*     | S   | KID FO3              |
|                                | 109  | 13:20189434           | 2     | p.D50N        | mis     | rs28931594   | 0  | AfUS IT*    | –   | KID FO3              |
|                                | 110  | 13:20189434           | 2     | p.D50Y        | mis     | rs28931594   | 0  | IT*         | S   | KID FO3              |
|                                | 111° | 13:20189241           | 2     | p.E114G       | mis     | rs2274083    | 0  | JP-AfUS FR* | S   | KID FO3              |
| ILIRN<br>(ENST00000409930)     | 112° | 2:113132707           | 4     | p.A124T       | mis     | rs45507693   | 1  | IT* FR*     | S   | PAPASH               |
| IRF2BP2<br>(ENST00000366609)   | 113  | 1:234608830-234608870 | 1     | p.A209Qfs*31  | fs      | –            | 0  | FI*         | F   | CVID                 |
| KDF1<br>(ENST00000320567)      | 114  | 1:26951628            | 2     | p.F251L       | mis     | rs1057519508 | 0  | SA          | F   | Ectodermal Dysplasia |
|                                | 115  | 1:26951621            | 2     | p.H254Y       | mis     | –            | 0  | FR*         | S   | Ectodermal Dysplasia |
| ~KLF5                          |      |                       | –     |               | –       |              |    |             |     |                      |
| LINC00393<br>(ENST00000443621) | 116  | 13:73432270           | 1-2   | g.73432270A>G | int     | rs17090189   | 0  | US*         | FS  | diverse              |
| KRT6A<br>(ENST00000330722)     | 117  | 12:52488362           | 7     | p.T464P       | mis     | rs61293647   | 1  | ES*         | S   | PC                   |
| KRT17<br>(ENST00000311208)     | 118  | 17:41624235           | 1     | p.N92S        | mis     | rs59151893   | 0  | IT*         | F   | FO4 PC               |
|                                | 119  | 17:41624226           | 1     | p.L95P        | mis     | rs28928899   | 0  | CN*         | S   | FO4 PC AS            |
| MEFV<br>(ENST00000219596)      | 120  | 16:3254338            | 2     | p.E244K       | mis     | rs1959081392 | 0  | ES          | S   | PAAND                |
|                                | 121° | 16:3254626            | 2     | p.E148Q       | mis     | rs3743930    | 0  | TR FR*      | FS  | FMF Pilonidal sinus  |
|                                | 122  | 16:3249675            | 3     | p.S339F       | mis     | rs104895157  | 0  | TR          | S   | –                    |
|                                | 123° | 16:3249586            | 3     | p.P369S       | mis     | rs11466023   | 0  | TR FR*      | S   | Robinow              |
|                                | 124° | 16:3249468            | 3     | p.R408Q       | mis     | rs11466024   | 0  | TR FR*      | S   | Robinow              |
|                                | 125° | 16:3243880            | 9     | p.I591T       | mis     | rs11466045   | 0  | IT* FR*     | S   | PASH                 |
|                                | 126  | 16:3243447            | 10    | p.M680I       | mis     | rs28940580   | 1  | TR          | FS  | PS SAPHO             |
|                                | 127  | 16:3243407            | 10    | p.M694V       | mis     | rs61752717   | 1  | MD TR       | FS  | PAPASH FMF FO3       |
|                                | 128  | 16:3243403            | 10    | p.K695R       | mis     | rs104895094  | 0  | div.        | –   | –                    |
|                                | 129  | 16:3243310            | 10    | p.V726A       | mis     | rs28940579   | 4  | AM MD TR    | FS  | PAPASH FO3 FMF       |
| NBPF12<br>(ENST00000698835)    | 130  | 1:146960267           | 7     | p.C42S        | mis     | rs1345358545 | 0  | div.        | F   | –                    |
| NF1P6<br>(ENST00000426025)     | 131  | 22:15627718           | 4-5   | n.602-2C>A    | spl     | rs776018604  | 0  | div.        | F   | –                    |
| NLRC4<br>(ENST00000402280)     | 132  | 2:32251323            | 4     | p.R181*       | non     | rs759551435  | 1  | IT*         | S   | PAPASH               |
|                                | 133  | 2:32235515            | 8     | p.C890R       | mis     | rs544969923  | 1  | IT*         | S   | PASH/SAPHO           |
| NLRP3<br>(ENST00000336119)     | 134° | 1:247425556           | 4     | p.Q703K       | mis     | rs35829419   | 1  | IT* FR*     | S   | PASH                 |
| NOD2<br>(ENST00000647318)      | 135  | 16:50699832           | 2     | p.A113T       | mis     | rs34684955   | 0  | div.        | –   | –                    |
|                                | 136  | 16:50710966           | 4     | p.H325R       | mis     | rs5743272    | 0  | div.        | –   | –                    |
|                                | 137  | 16:50711532           | 4     | p.R514W       | mis     | rs576658764  | 0  | div.        | –   | –                    |
|                                | 138° | 16:50712015           | 4     | p.R675W       | mis     | rs2066844    | 2  | IT* FR*     | S   | PASH                 |
|                                | 139  | 16:50712034           | 4     | p.R681H       | mis     | rs35285618   | 0  | div.        | –   | –                    |
|                                | 140° | 16:50712085           | 4     | p.A698G       | mis     | rs5743278    | 0  | FR*         | S   | –                    |
|                                | 141° | 16:50712280           | 4     | p.R763Q       | mis     | rs5743279    | 0  | FR*         | S   | –                    |
|                                | 142  | 16:50722629           | 8     | p.G881R       | mis spl | rs2066845    | 3  | IT*         | S   | PASH                 |
|                                | 143° | 16:50722660           | 8     | p.A891D       | mis     | rs104895452  | 0  | FR*         | S   | –                    |
|                                | 144  | 16:50725529           | 10    | p.L948V       | mis     | rs1337759230 | 1  | AM          | F   | FO3                  |

|                                | 145°              | 16:50729868 | 11    | p.L980Pfs*2                 | fs      | rs2066847    | 1 | IT* FR*   | S  | PASH            |
|--------------------------------|-------------------|-------------|-------|-----------------------------|---------|--------------|---|-----------|----|-----------------|
| NOTCH1<br>(ENST00000651671)    | 146               | 9:136510652 | 17-18 | c.2740+1G>T                 | spl     | –            | 0 | AfUS      | –  | Keratoacanthoma |
| NOTCH3<br>(ENST00000263388)    | 147° <sup>N</sup> | 19:15197571 | 2     | p.C43Lfs*32                 | fs      | rs749829137  | 0 | FR*       | S  | –               |
|                                | 148               | 19:15192130 | 4     | p.H170R                     | mis     | rs147373451  | 0 | div.      | F  | –               |
|                                | 149               | 19:15186898 | 12    | p.V644D                     | mis     | rs148046938  | 0 | div.      | F  | –               |
| NOTCH2NLA<br>(ENST00000362074) | 150               | 1:146189383 | 1-2   | c.-44-2A>G                  | spl     | rs3872062    | 0 | div.      | F  | –               |
| OCRL<br>(ENST00000371113)      | 151               | X:129562396 | 11    | p.R318C                     | mis     | rs137853263  | 1 | IT*       | F  | DD2             |
|                                | 152               | X:129569274 | 15    | p.R493W                     | mis     | rs137853846  | 1 | IT*       | –  | DD2             |
|                                | 153               | X:129569364 | 15    | p.D523N                     | mis     | –            | 1 | IT*       | F  | DD2             |
| OTULIN<br>(ENST00000284274)    | 154               | 5:14673698  | 2     | p.I70T                      | mis     | rs745829522  | 1 | IT*       | S  | PASH            |
|                                | 155°              | 5:14681484  | 4     | p.Q115H                     | mis     | rs147790160  | 1 | IT* FR*   | S  | PASH            |
| POFUT1<br>(ENST00000375749)    | 156               | 20:32216608 | 3-4   | c.430-1G>A                  | spl     | rs958172940  | 4 | ES*       | S  | DDD             |
|                                | 157               | 20:32230974 | 6     | p.W297*                     | non     | –            | 1 | ES*       | F  | DDD             |
| POGLUT1<br>(ENST00000295588)   | 158               | 3:119490567 | 9     | p.R272*                     | non     | rs747897279  | 1 | FR*       | F  | DDD             |
| PSTPIP1<br>(ENST00000558012)   | 159               | 15:76995150 | 5'    | c.-421CCTG[6]<br>[5to6-rep] | µsat    | rs55909412   | 0 | DE        | S  | PASH            |
|                                | 160               | 15:76995150 | 5'    | c.-421CCTG[8]<br>[5to8-rep] | µsat    | rs55909412   | 3 | TR RU FR* | FS | (PA)PASH, PCAS  |
|                                | 161               | 15:77032304 | 11    | p.E250Q                     | mis     | rs28939089   | 1 | DE*       | F  | PAPASH          |
|                                | 162               | 15:77032320 | 11    | p.T255M                     | mis     | rs766895096  | 1 | FI*       | –  | Diab PG UC      |
|                                | 163°              | 15:77032329 | 11    | p.G258A                     | mis     | rs34240327   | 0 | div. FR*  | S  | –               |
|                                | 164               | 15:77032387 | 11    | p.E277D                     | mis     | rs990986006  | 5 | MD        | S  | PAPASH/FMF      |
|                                | 165               | 15:77032439 | 12-13 | c.838+45C>[AGT]             | int     | rs116895455  | 0 | SG        | FS | –               |
|                                | 166               | 15:77035850 | 14    | p.Y345C                     | mis     | rs1192521928 | 3 | JP        | F  | PASH            |
|                                | 167°              | 15:77035928 | 14    | p.T371I                     | mis spl | rs34908107   | 0 | div. FR*  | FS | diverse         |
|                                | 168               | 15:77037018 | 14-15 | c.1120-27G>[AC]             | int     | rs766351379  | 0 | SG        | FS | –               |
|                                | 169°              | 15:77037069 | 15    | p.A382T                     | mis     | rs145344175  | 0 | div. FR*  | FS | diverse         |
|                                | 170               | 15:77037133 | 15    | p.G403E                     | mis     | rs201572812  | 0 | div.      | FS | diverse         |
|                                | 171               | 15:77037138 | 15    | p.R405C                     | mis     | rs201253322  | 4 | div. ES*  | FS | PASH            |
|                                | 172               | 15:77037146 | 15    | p.F407L                     | mis     | rs200363654  | 0 | SG        | FS | –               |
| PSMB8<br>(ENST00000374882)     | 173°              | 6:32843975  | 1     | p.G8R                       | mis     | rs114772012  | 0 | IT* FR*   | S  | AS PASH SAPHO   |
| RORC<br>(ENST00000318247)      | 174°              | 1:151831737 | 1     | p.R10*                      | non     | rs17582155   | 0 | div. FR*  | F  | –               |
| SLC46A2<br>(ENST00000374228)   | 175               | 9:112890266 | 1     | p.A139Gfs*39                | fs      | –            | 0 | div.      | F  | –               |
|                                | 176° <sup>N</sup> | 9:112889705 | 1     | p.A326Gfs*133               | fs      | rs1841700210 | 0 | FR*       | S  | –               |
| ~SOX9                          | 177               | 17:71515958 | –     | g.71515958G>A               | –       | rs10512572   | 0 | US*       | FS | diverse         |
| TCIRG1<br>(ENST00000265686)    | 178               | 11:68044207 | 9     | p.Q295*                     | non     | –            | 0 | div.      | F  | –               |
| WDR1<br>(ENST00000499869)      | 179°              | 4:10087915  | 8     | p.H248R                     | mis     | rs41268387   | 1 | IT* FR*   | S  | PASH/SAPHO      |

List of genes outside the  $\gamma$ -secretase complex: *AIM2* [19], *DCD* [20], *DEFB126* [21], *FGFR2* [22,23], *GJB2* [24–29], *IL1RN* [30], *IRF2BP2* [31], *KDF1* [32,33], *KRT6A* [34], *KRT17* [35,36], *MEFV* [22,29,30,37–39], *NBPF12* [21], *NF1P6* [21], *NLRC4* [29], *NLRP3* [30], *NOD2* [22,29,30,38], *NOTCH1* [40], *NOTCH3* [21,41], *NOTCH2NLA* [21], *OCRL* [42], *OTULIN* [29], *POFUT1* [43,44], *POGLUT1* [45], *PSTPIP1* [22,29,30,37,41,46–53], *PSMB8* [30], *RORC* [21], *SLC46A2* [21], *TCIRG1* [21], and *WDR1* [29]. Two variants were detected near *KLF5* and *SOX9* using GWAS approaches [54]. The lines with an (°) and in **bold** correspond to the above-mentioned variants (23) found in our HS cohorts. Those with an (°<sup>N</sup>) are the new ones (2), not mentioned in the literature. Ex.: exons; Eff.: effect (µsat, fs, int, mis, non, and spl meaning respectively microsatellite, frameshift, intronic variant, missense, nonsense, and splice site variant); R.: number of studied reviews [6,12–18,55–57] (out of 11) citing this mutation; Or.: origin. The two-letter country code was used for the various studies (AM:Armenia; CN:China; DE:Germany; ES:Spain; FR:France; GB:United Kingdom; IT:Italy; JP:Japan; MD:Moldova; RU:Russia; SA:Saudi Arabia; SG:Singapore; TR:Turkey; US:United States and AfUS for African-American populations). When the code is followed by an asterisk (\*), it indicates that the population is not explicitly mentioned in the article, and the country is inferred based on the authors' affiliations ; F/S: familial and/or sporadic case. The last column lists the disease and/or syndrome associations mentioned in the articles — all acronyms are defined in Supplementary Figure 1.

## References :

1. Nikolakis, G.; Kaleta, K.P.; Vaiopoulos, A.G.; Wolter, K.; Baroud, S.; Wojas-Pelc, A.; Zouboulis, C.C. Phenotypes and Pathophysiology of Syndromic Hidradenitis Suppurativa: Different Faces of the Same Disease? A Systematic Review. *DRM* **2021**, *237*, 673–697, doi:10.1159/000509873.
2. Duchatelet, S.; Miskinyte, S.; Delage, M.; Join-Lambert, O.; Coignard, H.; Lortholary, O.; Nassif, X.; Hovnanian, A.; Nassif, A. Coexistence d'une Acné Fulminante et d'une Hidrosadénite Suppurée : Syndrome ASH, Une Nouvelle Entité? *Annales de Dermatologie et de Vénéréologie* **2014**, *141*, S381–S382, doi:10.1016/j.annder.2014.09.350.
3. Phan, K.; Tatian, A.; Woods, J.; Cains, G.; Frew, J.W. Prevalence of Inflammatory Bowel Disease (IBD) in Hidradenitis Suppurativa (HS): Systematic Review and Adjusted Meta-Analysis. *Int J Dermatol* **2020**, *59*, 221–228, doi:10.1111/ijd.14697.
4. Moltrasio, C.; Tricarico, P.M.; Romagnuolo, M.; Marzano, A.V.; Crovella, S. Hidradenitis Suppurativa: A Perspective on Genetic Factors Involved in the Disease. *Biomedicines* **2022**, *10*, 2039, doi:10.3390/biomedicines10082039.
5. Gasparic, J.; Theut Riis, P.; Jemec, G.B. Recognizing Syndromic Hidradenitis Suppurativa: A Review of the Literature. *J Eur Acad Dermatol Venereol* **2017**, *31*, 1809–1816, doi:10.1111/jdv.14464.
6. Jfri, A.H.; O'Brien, E.A.; Litvinov, I.V.; Alavi, A.; Netchiporouk, E. Hidradenitis Suppurativa: Comprehensive Review of Predisposing Genetic Mutations and Changes. *J Cutan Med Surg* **2019**, *23*, 519–527, doi:10.1177/1203475419852049.
7. Yudin, A.I.; Generao, S.E.; Tollner, T.L.; Treece, C.A.; Overstreet, J.W.; Cherr, G.N. Beta-Defensin 126 on the Cell Surface Protects Sperm from Immunorecognition and Binding of Anti-Sperm Antibodies1. *Biology of Reproduction* **2005**, *73*, 1243–1252, doi:10.1095/biolreprod.105.042432.
8. Li, Y.; Tang, L.; Yue, J.; Gou, X.; Lin, A.; Weatherbee, S.D.; Wu, X. Regulation of Epidermal Differentiation through KDF1-mediated Deubiquitination of IKK $\alpha$ . *EMBO Rep* **2020**, *21*, e48566, doi:10.15252/embr.201948566.
9. Körholz, J.; Gabrielyan, A.; Sczakiel, H.L.; Schulze, L.; Rejzek, M.; Laass, M.W.; Leuchten, N.; Tiebel, O.; Aust, D.; Conrad, K.; et al. Novel Mutation and Expanding Phenotype in IRF2BP2 Deficiency. *Rheumatology (Oxford)* **2023**, *62*, 1699–1705, doi:10.1093/rheumatology/keac575.
10. Wu, C.; Yang, J.; Zhang, S.; Li, J.; Jin, H.; Zhang, X. A Novel NCSTN Gene Mutation in a Chinese Family with Acne Inversa. *Mol Genet Genomics* **2018**, *293*, 1469–1475, doi:10.1007/s00438-018-1475-9.
11. Li, C.; Xu, H.; Wang, B. Is SAPHO Syndrome Linked to PASH Syndrome and Hidradenitis Suppurativa by Nicastrin Mutation? A Case Report. *J Rheumatol* **2018**, *45*, 1605–1607, doi:10.3899/jrheum.171007.
12. Frew, J.W.; Hawkes, J.E.; Sullivan-Whalen, M.; Gilleaudeau, P.; Krueger, J.G. Inter-Relater Reliability of Phenotypes, and Exploratory Genotype- Phenotype Analysis in Inherited Hidradenitis Suppurativa. *Br J Dermatol* **2019**, *181*, 566–571, doi:10.1111/bjd.17695.
13. Wu, J.; Ge, H.; Fan, Y.; Zhen, Q.; Tang, L.; Sun, L. Novel Mutation of the NCSTN Gene Identified in a Chinese Acne Inversa Family. *Ann Dermatol* **2020**, *32*, 237–242, doi:10.5021/ad.2020.32.3.237.
14. Duchatelet, S.; Miskinyte, S.; Delage, M.; Ungeheuer, M.-N.; Lam, T.; Benhadou, F.; Del Marmol, V.; Vossen, A.R.J.V.; Prens, E.P.; Cogrel, O.; et al. Low Prevalence of GSC Gene Mutations in a Large Cohort of Predominantly Caucasian Patients with Hidradenitis Suppurativa. *Journal of Investigative Dermatology* **2020**, *140*, 2085–2088.e14, doi:10.1016/j.jid.2019.10.025.
15. Wang, Z.; Yan, Y.; Wang, B.  $\gamma$ -Secretase Genetics of Hidradenitis Suppurativa: A Systematic Literature Review. *DRM* **2021**, *237*, 698–704, doi:10.1159/000512455.
16. Vellaichamy, G.; Dimitrion, P.; Zhou, L.; Ozog, D.; Lim, H.W.; Liao, W.; Hamzavi, I.H.; Mi, Q.-S. Insights from  $\gamma$ -Secretase: Functional Genetics of Hidradenitis Suppurativa. *Journal of Investigative Dermatology* **2021**, *141*, 1888–1896, doi:10.1016/j.jid.2021.01.023.
17. Pace, N.P.; Mintoff, D.; Borg, I. The Genomic Architecture of Hidradenitis Suppurativa-A Systematic Review. *Front Genet* **2022**, *13*, 861241, doi:10.3389/fgene.2022.861241.
18. Eble, S.M.; Wisco, O.J.; Boccuto, L.; Laffin, B.; Parker, V.G.; Davis, N.J.; Temples, H.S. Genetic Factors Associated with Hidradenitis Suppurativa, a Literature Review. *Int J Womens Dermatol* **2024**, *10*, e158, doi:10.1097/JW9.0000000000000158.
19. Moltrasio, C.; Cagliani, R.; Sironi, M.; Clerici, M.; Pontremoli, C.; Maronese, C.A.; Tricarico, P.M.; Crovella, S.; Marzano, A.V. Autoinflammation in Syndromic Hidradenitis Suppurativa: The Role of AIM2. *Vaccines* **2023**, *11*, doi:10.3390/vaccines11010162.
20. Tricarico, P.M.; Gratton, R.; Dos Santos-Silva, C.A.; de Moura, R.R.; Ura, B.; Sommella, E.; Campiglia, P.; Del Vecchio, C.; Moltrasio, C.; Berti, I.; et al. A Rare Loss-of-Function Genetic Mutation Suggest a Role of Dermcidin Deficiency in Hidradenitis Suppurativa Pathogenesis. *Front Immunol* **2022**, *13*, 1060547, doi:10.3389/fimmu.2022.1060547.

21. Theut Riis, P.; Loft, I.C.; Yazdanyar, S.; Kjaersgaard Andersen, R.; Pedersen, O.B.; Ring, H.C.; Huber, R.; Sultan, M.; Loesche, C.; Saunte, D.M.L.; et al. Full Exome Sequencing of 11 Families with Hidradenitis Suppurativa. *J Eur Acad Dermatol Venereol* **2021**, *35*, 1203–1211, doi:10.1111/jdv.17095.
22. de Oliveira, A.S.L.E.; Bloise, G.; Moltrasio, C.; Coelho, A.; Agrelli, A.; Moura, R.; Tricarico, P.M.; Jamain, S.; Marzano, A.V.; Crovella, S.; et al. Transcriptome Meta-Analysis Confirms the Hidradenitis Suppurativa Pathogenic Triad: Upregulated Inflammation, Altered Epithelial Organization, and Dysregulated Metabolic Signaling. *Biomolecules* **2022**, *12*, 1371, doi:10.3390/biom12101371.
23. Higgins, R.; Pink, A.; Hunger, R.; Yawalkar, N.; Navarini, A.A. Generalized Comedones, Acne, and Hidradenitis Suppurativa in a Patient with an FGFR2 Missense Mutation. *Front Med (Lausanne)* **2017**, *4*, 16, doi:10.3389/fmed.2017.00016.
24. Nyquist, G.G.; Mumm, C.; Grau, R.; Crowson, A.N.; Shurman, D.L.; Benedetto, P.; Allen, P.; Lovelace, K.; Smith, D.W.; Frieden, I.; et al. Malignant Proliferating Pilar Tumors Arising in KID Syndrome: A Report of Two Patients. *Am. J. Med. Genet.* **2007**, *143A*, 734–741, doi:10.1002/ajmg.a.31635.
25. Lazic, T.; Li, Q.; Frank, M.; Uitto, J.; Zhou, L.H. Extending the Phenotypic Spectrum of Keratitis-Ichthyosis-Deafness Syndrome: Report of a Patient with GJB2 (G12R) Connexin 26 Mutation and Unusual Clinical Findings. *Pediatr Dermatol* **2012**, *29*, 349–357, doi:10.1111/j.1525-1470.2011.01425.x.
26. Bettoli, V.; Forconi, R.; Pezzini, I.; Martinello, R.; Scuderi, V.; Zedde, P.; Schettini, N.; Pacetti, L.; Corazza, M. KID Syndrome and Hidradenitis Suppurativa: A Rare Association Responding to Surgical Treatment. *Skin Appendage Disord* **2021**, *7*, 21–24, doi:10.1159/000509042.
27. Oliveira Mendonca, L.; Caroli, F. *Hidradenitis Suppurativa in KID's Syndrome: Genetic Characterisation, Clinical and Surgical Intervention*; 2019;
28. Montgomery, J.R.; White, T.W.; Martin, B.L.; Turner, M.L.; Holland, S.M. A Novel Connexin 26 Gene Mutation Associated with Features of the Keratitis-Ichthyosis-Deafness Syndrome and the Follicular Occlusion Triad. *Journal of the American Academy of Dermatology* **2004**, *51*, 377–382, doi:10.1016/j.jaad.2003.12.042.
29. Marzano, A.V.; Genovese, G.; Moltrasio, C.; Tricarico, P.M.; Gratton, R.; Piaserico, S.; Garcovich, S.; Boniotto, M.; Brandão, L.; Moura, R.; et al. Whole-Exome Sequencing in 10 Unrelated Patients with Syndromic Hidradenitis Suppurativa: A Preliminary Step for a Genotype-Phenotype Correlation. *Dermatology* **2022**, *238*, 860–869, doi:10.1159/000521263.
30. Marzano, A.V.; Ceccherini, I.; Gattorno, M.; Fanoni, D.; Caroli, F.; Rusmini, M.; Grossi, A.; De Simone, C.; Borghi, O.M.; Meroni, P.L.; et al. Association of Pyoderma Gangrenosum, Acne, and Suppurative Hidradenitis (PASH) Shares Genetic and Cytokine Profiles With Other Autoinflammatory Diseases. *Medicine (Baltimore)* **2014**, *93*, e187, doi:10.1097/MD.0000000000000187.
31. Palmroth, M.; Viskari, H.; Seppänen, M.R.J.; Keskitalo, S.; Virtanen, A.; Varjosalo, M.; Silvennoinen, O.; Isomäki, P. IRF2BP2 Mutation Is Associated with Increased STAT1 and STAT5 Activation in Two Family Members with Inflammatory Conditions and Lymphopenia. *Pharmaceuticals (Basel)* **2021**, *14*, 797, doi:10.3390/ph14080797.
32. Ziegler, A.; Ebstein, F.; Shamseldin, H.; Prouteau, C.; Krüger, E.; Binamer, Y.M.; Bonneau, D.; Alkuraya, F.S.; Martin, L. Gain-of-Function Variants in the KDF1 Gene Cause Hidradenitis Suppurativa Associated with Ectodermal Dysplasia by Stabilizing IκB Kinase  $\alpha$ . *Br J Dermatol* **2023**, *189*, 131–132, doi:10.1093/bjd/ljad075.
33. Shamseldin, H.E.; Khalifa, O.; Binamer, Y.M.; Almutawa, A.; Arold, S.T.; Zaidan, H.; Alkuraya, F.S. KDF1, Encoding Keratinocyte Differentiation Factor 1, Is Mutated in a Multigenerational Family with Ectodermal Dysplasia. *Hum Genet* **2017**, *136*, 99–105, doi:10.1007/s00439-016-1741-z.
34. Pedraz, J.; Peñas, P.; Garcia-Diez, A. Pachyonychia Congenita and Hidradenitis Suppurativa: No Response to Infliximab Therapy. *Journal of the European Academy of Dermatology and Venereology* **2008**, *22*, 1500–1501, doi:10.1111/j.1468-3083.2008.02691.x.
35. Yan, J.; Zhang, G.; Liao, C.; Wang, X.; Shi, L. ALA-iPDT for Follicular Occlusion Tetrad Concomitant with Pachyonychia Congenital Type II and Ankylosing Spondylitis. *Photodiagnosis and Photodynamic Therapy* **2022**, *39*, 102891, doi:10.1016/j.pdpdt.2022.102891.
36. Musumeci, M.L.; Fiorentini, F.; Bianchi, L.; Cascella, R.; Giardina, E.; Caputo, V.; Micali, G. Follicular Occlusion Tetrad in a Male Patient with Pachyonychia Congenita: Clinical and Genetic Analysis. *J Eur Acad Dermatol Venereol* **2019**, *33*, 36–39, doi:10.1111/jdv.15851.
37. Vural, S.; Gündoğdu, M.; Gökpinar İli, E.; Durmaz, C. d.; Vural, A.; Steinmüller-Magin, L.; Kleinhempel, A.; Holdt, L. m.; Ruzicka, T.; Giehl, K. a.; et al. Association of Pyrin Mutations and Autoinflammation with Complex Phenotype Hidradenitis Suppurativa: A Case–Control Study. *British Journal of Dermatology* **2019**, *180*, 1459–1467, doi:10.1111/bjd.17466.
38. Jfri, A.; Litvinov, I.V.; Netchiporouk, E.; O'Brien, E. Novel Variants of MEFV and NOD2 Genes in Familial Hidradenitis Suppurativa: A Case Report. *SAGE Open Med Case Rep* **2020**, *8*, 2050313X20953113, doi:10.1177/2050313X20953113.

39. Bueno-Molina, R.C.; Hernández-Rodríguez, J.-C.; Zulueta-Dorado, T.; Pereyra-Rodríguez, J.-J. Pyrin-Associated Autoinflammation with Neutrophilic Dermatitis: A Case Report. *The Journal of Dermatology* **2024**, *n/a*, doi:10.1111/1346-8138.17390.
40. Chen, J.Y.; Keiser, E.; LeBoit, P.; Yeh, I.; Wei, M.L. A Rare Case of Axillary Keratoacanthoma Arising in Hidradenitis Suppurativa. *JAAD Case Rep* **2022**, *21*, 49–51, doi:10.1016/j.jdc.2021.12.013.
41. Morales-Heil, D.J.; Cao, L.; Sweeney, C.; Malara, A.; Brown, F.; Milam, P.; Anadkat, M.; Kaffenberger, J.; Kaffenberger, B.; Nagele, P.; et al. Rare Missense Variants in the SH3 Domain of PSTPIP1 Are Associated with Hidradenitis Suppurativa. *HGG Adv* **2023**, *4*, 100187, doi:10.1016/j.xhgg.2023.100187.
42. Marzuillo, P.; Piccolo, V.; Mascolo, M.; Apicella, A.; Argenziano, G.; Della Vecchia, N.; Guarino, S.; Miraglia del Giudice, E.; La Manna, A. Patients Affected by Dent Disease 2 Could Be Predisposed to Hidradenitis Suppurativa. *Journal of the European Academy of Dermatology and Venereology* **2018**, *32*, e309–e311, doi:10.1111/jdv.14860.
43. García-Gil, M.F.; Monte Serrano, J.; Ramirez-Lluch, M.; Valero Torres, A.; López-Giménez, M.T.; Lezcano Biosca, V. A Novel Mutation in POFUT1 Gene Associated with Dowling-Degos Disease and Hidradenitis Suppurativa. *Int J Dermatol* **2021**, *60*, e25–e27, doi:10.1111/ijd.15092.
44. González-Villanueva, I.; Gutiérrez, M.; Hispán, P.; Betloch, I.; Pascual, J. c. Novel POFUT1 Mutation Associated with Hidradenitis Suppurativa–Dowling–Degos Disease Firm up a Role for Notch Signalling in the Pathogenesis of This Disorder. *British Journal of Dermatology* **2018**, *178*, 984–986, doi:10.1111/bjd.16264.
45. Duchatelet, S.; Clerc, H.; Machet, L.; Gaboriaud, P.; Miskinyte, S.; Kervarrec, T.; Hovnanian, A. A New Nonsense Mutation in the POGUT1 Gene in Two Sisters with Dowling–Degos Disease. *Journal of the European Academy of Dermatology and Venereology* **2018**, *32*, e440–e442, doi:10.1111/jdv.14958.
46. Duchatelet, S.; Miskinyte, S.; Join-Lambert, O.; Ungeheuer, M.-N.; Francès, C.; Nassif, A.; Hovnanian, A. First Nicastrin Mutation in PASH (Pyoderma Gangrenosum, Acne and Suppurative Hidradenitis) Syndrome. *Br J Dermatol* **2015**, *173*, 610–612, doi:10.1111/bjd.13668.
47. Shen, M.; Yeoh, X.L.A.; Wang, D.Y.; Tey, H.L.; Ren, E.C.; Oon, H.H. Genetic Variations in Gamma-Secretase and PSTPIP1 in Hidradenitis Suppurativa in Singaporean Chinese. *J Eur Acad Dermatol Venereol* **2021**, *35*, e348–e350, doi:10.1111/jdv.17125.
48. Braun-Falco, M.; Kovnerystyy, O.; Lohse, P.; Ruzicka, T. Pyoderma Gangrenosum, Acne, and Suppurative Hidradenitis (PASH)—a New Autoinflammatory Syndrome Distinct from PAPA Syndrome. *Journal of the American Academy of Dermatology* **2012**, *66*, 409–415, doi:10.1016/j.jaad.2010.12.025.
49. Kotzerke, M.; Mitri, F.; Marbach, F.; Enk, A.; Haenssle, H. A Case of PAPASH Syndrome in a Young Man Carrying a Novel Heterozygote Missense Variant in PSTPIP1. *J Eur Acad Dermatol Venereol* **2021**, *35*, e439–e440, doi:10.1111/jdv.17171.
50. Hietä, N.; Nuutinen, H.; Roivas, J.; Salminen, K.; Kujari, H.; Talve, L.; Toivonen, M.; Haanpää, M.K. Severe Ulcerative Proctitis, Pyoderma Gangrenosum, Hidradenitis Suppurativa and Fever in a Patient with a Rare Variant of the PSTPIP1 Gene. *Clin Exp Dermatol* **2021**, *46*, 1387–1390, doi:10.1111/ced.14754.
51. Marzano, A.V.; Trevisan, V.; Gattorno, M.; Ceccherini, I.; De Simone, C.; Crosti, C. Pyogenic Arthritis, Pyoderma Gangrenosum, Acne, and Hidradenitis Suppurativa (PAPASH): A New Autoinflammatory Syndrome Associated With a Novel Mutation of the PSTPIP1 Gene. *JAMA Dermatology* **2013**, *149*, 762–764, doi:10.1001/jamadermatol.2013.2907.
52. Saito, N.; Minami-Hori, M.; Nagahata, H.; Nozaki, H.; Iinuma, S.; Igawa, S.; Kanno, K.; Kishibe, M.; Kanazawa, N.; Ishida-Yamamoto, A. Novel PSTPIP1 Gene Mutation in Pyoderma Gangrenosum, Acne and Suppurative Hidradenitis Syndrome. *J Dermatol* **2018**, *45*, e213–e214, doi:10.1111/1346-8138.14259.
53. Calderón-Castrat, X.; Bancalari-Díaz, D.; Román-Curto, C.; Romo-Melgar, A.; Amorós-Cerdán, D.; Alcaraz-Mas, L.A.; Fernández-López, E.; Cañueto, J. PSTPIP1 Gene Mutation in a Pyoderma Gangrenosum, Acne and Suppurative Hidradenitis (PASH) Syndrome. *Br J Dermatol* **2016**, *175*, 194–198, doi:10.1111/bjd.14383.
54. Sun, Q.; Broadaway, K.A.; Edmiston, S.N.; Fajgenbaum, K.; Miller-Fleming, T.; Westerkam, L.L.; Melendez-Gonzalez, M.; Bui, H.; Blum, F.R.; Levitt, B.; et al. Genetic Variants Associated With Hidradenitis Suppurativa. *JAMA Dermatology* **2023**, *159*, 930–938, doi:10.1001/jamadermatol.2023.2217.
55. Jiao, T.; Dong, H.; Jin, L.; Wang, S.; Wang, J. A Novel Nicastrin Mutation in a Large Chinese Family with Hidradenitis Suppurativa. *British Journal of Dermatology* **2013**, *168*, 1141–1143, doi:10.1111/bjd.12135.
56. Ratnamala, U.; Jain, N.K.; Jhala, D.D.; Prasad, P.V.S.; Saiyed, N.; Nair, S.; Radhakrishna, U. An Updated Mutation Spectrum of the  $\gamma$ -Secretase Complex: Novel NCSTN Gene Mutation in an Indian Family with Hidradenitis Suppurativa and Acne Conglobata. *Indian J Dermatol* **2023**, *68*, 141–147, doi:10.4103/ijd.ijd\_995\_21.
57. Frew, J.W.; Vekic, D.A.; Woods, J.; Cains, G.D. A Systematic Review and Critical Evaluation of Reported Pathogenic Sequence Variants in Hidradenitis Suppurativa. *Br J Dermatol* **2017**, *177*, 987–998, doi:10.1111/bjd.15441.
