# Supplementary material for: Comprehensive Catalog of Variants Potentially Associated with Hidradenitis Suppurativa, Including Newly Identified Variants from a Cohort of 100 Patients
Source: Preprints.org preprint supplement (doi:10.20944/preprints202408.0431.v1), 2024-08-07
Supplement: Supplementary file 1 [file supplementary]

## Sheet: Data
varID	geneName	chromosome	GRCh37_position	GRCh38_position	T2T_position	exon	c.HGVS	p.HGVS	p.HGVS	effect	rsID	nbReviews	origin	sporadicORfamilial	comorbidities	technology	gnomAD	AF-ALL	nhomalt	AF-AFR	AF-NFE	CADD	Revel	AlphaMissense	SpliceAI	Pangolin	PhyloP	SIFT	PolyPhen-2	Hstot	Hsref	Hsalt(het)	Hsalt(hom)	Ctltot	Ctlref	Ctlalt(het)	Ctlalt(hom)
1	APH1A (ENST00000369109)	1	150240180	150267780	149392697	3	c.294T>A	p.Asp98Glu	p.D98E	mis|spl	rs996158631	0	div.	–	–	RNAseq	PASS	2.47137e-05	0	0	3.06421e-05	20	0.088	0.4749	0.14	0.07	3.697	1	0.079
2°	APH1B (ENST00000261879)	15	63569901	63277702	61082482	1	c.79A>G	p.Thr27Ala	p.T27A	mis	rs77834210	0	FR*	S	–	WES	PASS	0.00328767	146	0.0105133	6.93167e-05	14.07	0.06	0.0631	0	0.02	0.855	0.75	0.138	100	98	2	0	100	100	0	0
3°N	APH1B (ENST00000261879)	15	63571457	63279258	61084038	2	c.211C>G	p.Leu71Val	p.L71V	mis	–	0	FR*	S	–	WES	NA					18.4		0.1056	0		-0.013	0.01	0.998	100	99	1	0	100	100	0	0
4	APH1B (ENST00000261879)	15	63594574	63302375	61107156	5	c.509A>G	p.His170Arg	p.H170R	mis	rs139355584	2	div.	F	–	WES	PASS	2.32591e-05	0	0	2.87778e-05	24.9	0.556	0.9196	0	0	4.689	0	0.516
5°	APH1B (ENST00000261879)	15	63594615	63302416	61107197	5	c.554del(A)	p.Lys185SerfsTer10	p.K185Sfs*10	fs	rs745918508	0	FR*	S	–	WES	PASS	7.31955e-05	0	2.98686e-05	9.26272e-05	27.8	-		0	0.09	3.42	-	-	100	99	1	0	100	99	1	0
6	APH1B (ENST00000261879)	15	63597969	63305770	61110553	6	c.763C>T	p.Arg255Cys	p.R255C	mis	rs142676640	0	div.	–	–	RNAseq	PASS	0.000741675	3	0.000149539	0.000892139	28.5	0.3	0.132	0	0.02	3.543	0	0.996
7	NCSTN (ENST00000294785)	1	160313198	160343408	159480480	1	c.17del(G)	p.Gly6ValfsTer22	p.G6Vfs*22	fs	rs1266104510	0	div.	–	–	WGS	PASS	6.84554e-07	0	0	8.9948e-07	22.8	-		0	0.02	-1.606	-	-
8	NCSTN (ENST00000294785)	1	160313224	160343434	159480506	1	c.38del(G)	p.Gly13GlufsTer15	p.G13Efs*15	fs	–	3	DE	S	AC	targeted	NA					23.7			0		0.515	-	-
9°N	NCSTN (ENST00000294785)	1	160313233	160343443	159481839	1	c.47dup(G)	p.Leu17SerfsTer30	p.L17Sfs*30	fs	–	0	FR*	S	–	WES	NA					25.2			0.05		0.174	-	-	100	99	1	0	100	100	0	0
10	NCSTN (ENST00000294785)	1	160314523	160344733	159481805	2	c.97G>A	p.Gly33Arg	p.G33R	mis|spl	–	6	JP	F	–	WES	NA					28		0.6546	0		4.494	0.02	0.628
11	NCSTN (ENST00000294785)	1	160314557	160344767	159481839	2	c.131T>A	p.Leu44Ter	p.L44*	non	–	0	BR	F	DDD	WES	NA					37			0.01		3.352	-	-
12	NCSTN (ENST00000294785)	1	160314608	160344818	159481890	2	c.182G>T	p.Gly61Val	p.G61V	mis	–	3	FR*|MT*	F	–	targeted	PASS	6.84381e-07	0	0	0	29.1	0.934	0.9957	0.02	0.02	8.776	0	0.999
13	NCSTN (ENST00000294785)	1	160318808	160349018	159486090	3	c.210_211del(AG)	p.Val72TyrfsTer16	p.V72Yfs*16	fs	rs1243425689	10	CN	F	–	WES	PASS	6.8405e-07	0	0	0	33	-		0	0	8.903	-	-
14	NCSTN (ENST00000294785)	1	160318821	160349031	159486103	3	c.223G>A	p.Val75Ile	p.V75I	mis	rs12045198	10	CN	F	–	targeted	PASS	9.44012e-05	1	5.97372e-05	0.000102521	22.7	0.248	0.0824	0.09	0.15	7.032	0.03	0.306
15°	NCSTN (ENST00000294785)	1	160318829	160349039	159486111	3	c.231G>C	p.Glu77Asp	p.E77D	mis	rs35603924	0	div.|FR*	S	–	WES/RNAseq	PASS	0.00154734	65	0.0557945	3.77703e-05	18.04	0.103	0.2079	0	0	2.449	0.09	0.025	100	99	1	0	100	100	0	0
16	NCSTN (ENST00000294785)	1	160318876	160349086	159486158	3	c.278del(C)	p.Pro93LeufsTer15	p.P93Lfs*15	fs	–	8	CN	FS	SAPHO	WES/WES & targeted	PASS	6.84048e-07	0	0	8.99277e-07	24.8	-		0.25	0.31	6.332	-	-
17	NCSTN (ENST00000294785)	1	160319368	160349578	159486657	4	c.344_351del(CCAGCCGA)	p.Thr115AsnfsTer20	p.T115Nfs*20	fs	–	9	FR*	–	PASH	targeted	NA					34			-		4.42	-	-
18	NCSTN (ENST00000294785)	1	160319373	160349583	159486655	4	c.349C>T	p.Arg117Ter	p.R117*	non	rs387906896	10	CN|US*|AfUS	F	–	GWLS & targeted/targeted/WES	PASS	6.84085e-07	0	0	8.99332e-07	36	-		0.01	0.18	2.794	-	-
19	NCSTN (ENST00000294785)	1	160319589	160349799	159486871	4-5	c.436+129A>G	–	–	int	rs2274184	0	SG	FS	–	targeted/Assoc	PASS	0.0361504	1292	0.152683	0.0254372	5.04	-		0	0.01	-0.002	-	-
20	NCSTN (ENST00000294785)	1	160319905	160350115	159487187	5	c.447del(C)	p.Asn150IlefsTer52	p.N150Ifs*52	fs	–	2	CN	F	–	WES	NA					34			0.01		2.907	-	-
21	NCSTN (ENST00000294785)	1	160319908	160350118	159487199	5	c.450_459del(TTCCTATGGG)	p.Ser151GlnfsTer48	p.S151Qfs*48	fs	–	4	CN	F	–	targeted	NA					34			-		4.352	-	-
22	NCSTN (ENST00000294785)	1	160319935	160350145	159487217	5	c.477C>A	p.Cys159Ter	p.C159*	non	–	9	CN|GR*	F	–	targeted//targeted	NA					32			0		0.499	-	-
23	NCSTN (ENST00000294785)	1	160319940	160350150	159487222	5	c.482del(A)	p.Ile162TyrfsTer40	p.I162Yfs*40	fs	–	1	IT*	S	PASH/SAPHO	WES	NA					16.9			0.01		-0.098	-	-
24	NCSTN (ENST00000294785)	1	160319945	160350155	159487227	5	c.487del(C)	p.Gln163SerfsTer39	p.Q163Sfs*39	fs	–	10	FR	F	–	targeted	NA					19.1			0.01		-1.327	-	-
25	NCSTN (ENST00000294785)	1	160319955	160350165	159487237	5	c.497C>A	p.Ser166Ter	p.S166*	non	–	6	CN	F	–	targeted	NA					25.8			0		-0.502	-	-
26	NCSTN (ENST00000294785)	1	160320011	160350221	159487293	5	c.553G>A	p.Asp185Asn	p.D185N	mis	rs201293070	9	GB*	S	Diab	targeted	PASS	1.09451e-05	0	0	1.43887e-05	22.9	0.165	0.1257	0	0.03	7.004	0.34	0.011
27	NCSTN (ENST00000294785)	1	160320041	160350251	159487323	5-6	c.582+1del(G)	p.Cys195_Pro245del(x6) | p.Cys195_Gly332del(x6-8)	–	spl*	–	10	JP	F	–	targeted	NA					36			0.99		4.494	-	-
28	NCSTN (ENST00000294785)	1	160320041	160350251	159487323	5-6	c.582+1G>A	–	–	spl	rs1373027391	0	SG	FS	–	targeted/Assoc	PASSgenome	6.196e-07	0	0	8.475e-07	34			0.99	0.88	8.79
29	NCSTN (ENST00000294785)	1	160321046	160351256	159488328	6	c.617C>A	p.Ser206Ter	p.S206*	non	–	7	CN*	F	–	targeted	NA					40			0.25		2.907	-	-
30	NCSTN (ENST00000294785)	1	160321061	160351271	159488343	6	c.632C>G	p.Pro211Arg	p.P211R	mis	–	10	CN	S	–	targeted	NA					26.8		0.9437	0		2.907	0	0.999
31	NCSTN (ENST00000294785)	1	160321076	160351286	159488358	6	c.647A>C	p.Gln216Pro	p.Q216P	mis	–	9	CN|MT*	F	–	targeted	NA					32		0.9951	0.03		3.37	0	0.983
32	NCSTN (ENST00000294785)	1	160321100	160351310	159488393	6	c.671_682del(TCATCAGCACTG)	p.Val224_Thr227del	p.V224_T227del	del	–	3	MT	F	–	WES/targeted	NA					19.93			-		4.494	-	-
33	NCSTN (ENST00000294785)	1	160321115	160351325	159488398	6	c.686_687dup(CC)	p.Cys230ProfsTer32	p.C230Pfs*32	fs	–	8	CN|IN	F	AC	targeted	NA					34			-		3.37	-	-
34	NCSTN (ENST00000294785)	1	160321503	160351713	159488786	7	c.751_752del(CT)	p.Leu251ValfsTer2	p.L251Vfs*2	fs	–	3	CN	F	Com	WES & targeted/targeted	NA					34			0		3.352	-	-
35	NCSTN (ENST00000294785)	1	160321545	160351755	159488827	7	c.793_794ins(A)	p.Thr265AsnfsTer8	p.T265Nfs*8	fs	–	2	CN	F	–	targeted	NA					24.7			0		0.784	-	-
36	NCSTN (ENST00000294785)	1	160321887	160352097	159489169	8	c.887A>G	p.Glu296Gly	p.E296G	mis	rs758910156	7	CN|MT*	F	–	targeted	PASS	1.02607e-05	0	0	0	25.9	0.507	0.4553	0.03	0.02	6.335	0	0.536
37°N	NCSTN (ENST00000294785)	1	160321894	160352104	159489176	8	c.896_897dup(TG)	p.Ala300TrpfsTer20	p.A300Wfs*20	fs	–	0	FR*	F	–	WES	NA					34			-		4.494	-	-	100	97	3	0	100	100	0	0
38	NCSTN (ENST00000294785)	1	160321944	160352154	159489226	8	c.944C>T	p.Ala315Val	p.A315V	mis	rs1553210405	9	CN	F	–	targeted	noMatch					24.2		0.0621	0.97		0.515	0.68	0.255
39	NCSTN (ENST00000294785)	1	160321978	160352188	159489260	8	c.978del(G)	p.Met326IlefsTer31	p.M326Ifs*31	fs	–	5	SG	–	–	targeted	NA					35			0		4.494	-	-
40	NCSTN (ENST00000294785)	1	160321997	160352207	159489279	8-9	c.996+1G>A	p.Glu333Gln367del(x9)	p.E333Q367del(x9)	spl*	–	5	GB	F	–	targeted	NA					33			0.98		4.494	-	-
41	NCSTN (ENST00000294785)	1	160322003	160352213	159489285	8-9	c.996+7G>A	–	–	int	rs202046846	9	GB*|FR*	S	AC|Diab	targeted/targeted	PASS	0.000522674	0	0.000209118	0.000638554	10.26	-		0	0.01	1.415	-	-
42	NCSTN (ENST00000294785)	1	160322782	160352992	159490064	9-10	c.1101+1G>A	–	–	spl	rs1347055289	10	GB	F	–	targeted	PASS	3.42381e-06	0	0	4.50195e-06	34	-		1	0.9	8.796	-	-
43	NCSTN (ENST00000294785)	1	160322791	160353001	159490073	9-10	c.1101+10A>G	–	–	int	rs1048828525	9	GB*	S	–	targeted	PASS	1.37483e-06	0	3.00246e-05	9.0455e-07	0.129	-		0	0	-2.202	-	-
44	NCSTN (ENST00000294785)	1	160322988	160353198	159490270	10	c.1140_1141del(AG)	p.Asp381SerfsTer7	p.D381Sfs*7	fs	–	1	IT*	S	PAPASH	WES	NA					34			0.01		4.481	-	-
45°	NCSTN (ENST00000294785)	1	160323903	160354113	159491185	10-11	c.1180-5C>G	–	–	int	rs7528638	5	GB|FR*	F	–	targeted	PASS	0.0511553	2138	0.0800406	0.0555609	7.932	-		0.41	0.08	0.092	-	-	99	92	7	0	100	88	11	1
46	NCSTN (ENST00000294785)	1	160323957	160354167	159491239	11	c.1229C>T	p.Ala410Val	p.A410V	mis	rs147225198	6	US*	S	–	targeted	PASS	0.000215477	0	2.98686e-05	0.000258094	15.91	0.138	0.0997	0.05	0.05	0.051	0.28	0.049
47°	NCSTN (ENST00000294785)	1	160323977	160354187	159491259	11	c.1249A>T	p.Asn417Tyr	p.N417Y	mis	rs143039637	0	div.|FR*	S	–	WES	PASS	0.0040729	21	0.000686977	0.00471861	22.5	0.225	0.0934	0.01	0.01	0.732	0.02	0.447	100	99	1	0	100	100	0	0
48	NCSTN (ENST00000294785)	1	160323980	160354190	159491262	11	c.1252C>T	p.Gln418Ter	p.Q418*	non	–	0	div.	–	–	WGS	NA					36			0.1		0.134	-	-
49	NCSTN (ENST00000294785)	1	160323986	160354196	159491268	11	c.1258C>T	p.Gln420Ter	p.Q420*	non	–	10	CN|SG|div.	F	–	targeted//targeted/targeted	NA					38			0.2		0.934	-	-
50°	NCSTN (ENST00000294785)	1	160324013	160354223	159491295	11	c.1285C>T	p.Arg429Ter	p.R429*	non	rs771414318	5	JP|FR*	F	–	targeted/WES	PASS	6.84048e-07	0	0	8.99277e-07	39	-		0.11	0.06	7.038	-	-	100	99	1	0	100	100	0	0
51	NCSTN (ENST00000294785)	1	160324022	160354232	159491304	11	c.1294C>T	p.Arg432Ter	p.R432*	non	–	3	CN*	FS	KTS	WES/targeted	NA					42			0		1.588	-	-
52	NCSTN (ENST00000294785)	1	160324028	160354238	159491310	11	c.1300C>T	p.Arg434Ter	p.R434*	non	rs1085307081	10	CN|ES*|FR	F	DDD	targeted/targeted/targeted	PASS	6.84048e-07	0	0	0	40	-		0	0.08	8.865	-	-
53	NCSTN (ENST00000294785)	1	160324053	160354263	159491336	11	c.1325_1326ins(GTTGTTCTGTAGTGGC)	p.Asp443LeufsTer6	p.D443Lfs*6	fs	–	3	ES*	–	DDD	targeted	NA					34			-		3.352	-	-
54	NCSTN (ENST00000294785)	1	160324081	160354291	159491363	11-12	c.1352+1G>A	–	–	spl	–	9	CN	F	–	WES/targeted	NA					32			0.91		4.494	-	-
55	NCSTN (ENST00000294785)	1	–	160354194		11	c.1381del(C)	–	–	fs	–	2	FR*	F	–	NA	NA					33			0.02		2.907	-	-
56	NCSTN (ENST00000294785)	1	160325731	160355941	159493013	13	c.1534C>T	p.Gln512Ter	p.Q512*	non	–	3	CN*	F	–	targeted	NA					36			0.01		0.426	-	-
57	NCSTN (ENST00000294785)	1	160325749	160355959	159493031	13-14	c.1551+1G>A	p.Ala486_Thr517del(x13)	p.A486_T517del(x13)	spl*	rs1553210984	9	CN	F	–	GWLS	noMatch					33			0.98		4.438
58	NCSTN (ENST00000294785)	1	160326053	160356263	159493335	14	c.1555dup(A)	p.Thr519AsnfsTer10	p.T519Nfs*10	fs	–	3	CN	S	–	targeted	NA					29.8			0		3.257	-	-
59	NCSTN (ENST00000294785)	1	160326133	160356343	159493415	14	c.1635C>G	p.Tyr545Ter	p.Y545*	non	–	8	IR	F	PASH	GWLS	NA					36			0.02		0.456	-	-
60	NCSTN (ENST00000294785)	1	160326445	160356655	159493727	15	c.1695T>G	p.Tyr565Ter	p.Y565*	non	–	10	CN	F	–	targeted	NA					25.4			0.07		-1.624	-	-
61	NCSTN (ENST00000294785)	1	160326452	160356662	159493734	15	c.1702C>T	p.Gln568Ter	p.Q568*	non	–	9	JP	F	–	targeted	NA					38			0		2.872	-	-
62	NCSTN (ENST00000294785)	1	160326477	160356687	159493759	15	c.1727G>T	p.Gly576Val	p.G576V	mis	–	3	FR*|MT*	F	–	targeted	NA					26.7		0.9543	0		4.438	0	0.998
63	NCSTN (ENST00000294785)	1	160326497	160356707	159493779	15	c.1747C>T	p.Arg583Ter	p.R583*	non	–	3	IT*	F	DDD	targeted	PASS	6.84044e-07	0	0	8.99271e-07	37	-		0.01	0.31	7.093	-	-
64	NCSTN (ENST00000294785)	1	160326502	160356712	159493784	15	c.1752del(G)	p.Glu584AspfsTer44	p.E584Dfs*44	fs	rs1553211087	10	CN	F	–	GWLS/targeted	noMatch					32			0.05		1.894	-	-
65	NCSTN (ENST00000294785)	1	160326518	160356728	159493800	15	c.1768A>G	p.Ser590Gly/p.Ser590AlafsTer3	p.S590G/p.S590Afs*3	mis|spl	–	10	FR	F	–	targeted	NA					23.8		0.0705	0.96		3.329	0.52	0
66	NCSTN (ENST00000294785)	1	160326836	160357046	159494119	16	c.1800_1801del(TG)	p.Tyr600Ter	p.Y600*	fs	–	6	CN|IN	FS	AC	targeted/targeted	NA					35			0.14		4.434	-	-
67	NCSTN (ENST00000294785)	1	160326912	160357122	159494194	16	c.1876C>T	p.Arg626Ter	p.R626*	non	–	3	ES*|IN	F	DDD|AC	targeted	NA					40			0.17		1.572	-	-
68	NCSTN (ENST00000294785)	1	160326951	160357161	159494236	16	c.1915_1918del(CAGT)	p.Gln639GlyfsTer31	p.Q639Gfs*31	fs	–	5	NL	F	–	WGS & targeted	NA					34			0.05		1.642	-	-
69°N	NCSTN (ENST00000294785)	1	160326979	160357189	159494261	16	c.1943G>A	p.Trp648Ter	p.W648*	non	–	0	FR*	S	–	WES	NA					51			0.49		4.422	-	-	100	99	1	0	100	100	0	0
70	NCSTN (ENST00000294785)	1	160328578	160358788	159495861	3'	c.*517_*518del(CA)	–	–	utr	rs141849450	4	CN	S	–	targeted	PASS	0.022367	22	0	0.000187301	10.51	-		0	0	4.684	-	-
71	PSEN1 (ENST00000324501)	14	73653606	73186897	67392390	6	c.532dup(T)	p.Ser178PhefsTer10	p.S178Ffs*10	fs	rs1174374799	0	div.	–	–	RNAseq	PASS	6.843e-07	0	0	8.99598e-07	30	-		0	0.05	4.773	-	-
72	PSEN1 (ENST00000324501)	14	73659528	73192820	67398312	7	c.725del(C)	p.Pro242LeufsTer11	p.P242Lfs*11	fs	rs1595035030	10	CN	F	–	GWLS	noMatch					24			0		-0.069	-	-
73°	PSEN1 (ENST00000324501)	14	73664853	73198145	67403634	8-9	c.868+16G>T	–	–	int	rs165932	4	CN|div.|FR*	S	Ps	targeted	PASS	0.576397	217223	0.741826	0.554721	9.582	-		0	0	1.22	-	-	100	20	45	35	100	18	54	28
74°	PSEN1 (ENST00000324501)	14	73673178	73206470	67411932	9	c.953A>G	p.Glu318Gly	p.E318G	mis|spl	rs17125721	8	GB|div.|FR*	F	–	targeted	PASS	0.01812	318	0.00224942	0.0198946	23.4	0.476	0.0897	0.09	0.09	4.676	0.21	0.034	100	96	4	0	100	95	5	0
75°N	PSEN1 (ENST00000324501)	14	73678494	73211786	67417248	10	c.973C>G	p.Gln325Glu	p.Q325E	mis	–	0	FR*	S	–	WES	NA					18.8		0.0631	0		2.768	0.67	-	100	99	1	0	100	100	0	0
76	PSEN1 (ENST00000324501)	14	73683871	73217163	67422622	11	c.1167_1168ins(GA)	p.Ser390GlufsTer20	p.S390Efs*20	fs	–	3	FR*	F	Crohn	targeted	NA					34			-		3.195	-	-
77°	PSEN1 (ENST00000324501)	14	73683960	73217252	67422711	11-12	c.1248+8T>C	–	–	int	rs362382	0	div.|FR*	S	–	WES	PASS	0.00163102	63	0.0548817	0.000118723	13.68	-		0	0	0.211	-	-	100	97	3	0	100	100	0	0
78°	PSEN2 (ENST00000366783)	1	227069708	226882007	226069916	4	c.100G>A	p.Gly34Ser	p.G34S	mis	rs200636353	0	FR*	S	–	WES	PASS	0.000158035	1	0	8.09398e-06	17.7	0.331	0.0774	0	0.01	2.729	0.36	0.007	100	99	1	0	100	100	0	0
79	PSEN2 (ENST00000366783)	1	227081774	226894073	226081985	12	c.1139C>A	p.Thr380Lys	p.T380K	mis	rs143912759	0	div.	–	–	RNAseq	PASS	6.49858e-05	1	0	1.25901e-05	24.3	0.897	0.3225	0	0	8.862	0.18	0.958
80	PSENEN (ENST00000587708)	19	36236844	35745943	38291253	2	c.13C>T	p.Arg5Ter	p.R5*	non	–	3	CN	F	–	targeted	PASS	6.84091e-07	0	0	8.99292e-07	37	-		0.14	0.09	4.998	-	-
81	PSENEN (ENST00000587708)	19	36236866	35745965	38291275	2	c.35T>A	p.Leu12Ter	p.L12*	non	rs1555738763	5	DE	–	DDD	targeted	noMatch					38			0.02		3.348	-	-
82	PSENEN (ENST00000587708)	19	36236874	35745973	38291296	2	c.43_56del(TGCCGGAAGTACTA)	p.Cys15ProfsTer101	p.C15Pfs*101	fs	–	5	JP	F	AC	targeted	NA					35			-		4.489	-	-
83	PSENEN (ENST00000587708)	19	36237319	35746418	38291728	2-3	c.62-1G>C	p.Gly21_Tyr56del(x3)	p.G21_Y56del(x3)	spl*	rs1555738836	4	IN	F	DDD	WES & targeted	noMatch					32			0.97		4.484
84	PSENEN (ENST00000587708)	19	36237319	35746418	38291728	2-3	c.62-1G>T	–	–	spl	–	5	IN*	F	DDD	targeted	NA					32			0.97		4.484
85	PSENEN (ENST00000587708)	19	36237324	35746423	38291734	3	c.66_67ins(G)	p.Phe23ValfsTer98	p.F23Vfs*98	fs	rs1555738837	10	GB*|FR*	FS	DDD	targeted/targeted	noPASS	1.37093e-06	0	0	1.80201e-06	34	-		0.97	0.84	4.701	-	-
86	PSENEN (ENST00000587708)	19	36237324	35746423	38291733	3	c.66del(G)	p.Phe23LeufsTer46	p.F23Lfs*46	fs	rs1555738837	10	CN	FS	DDD|Ps	GWLS/targeted/targeted/WES	PASS	2.74188e-06	0	0	1.80202e-06	34	-		0.97	0.84	4.701	-	-
87	PSENEN (ENST00000587708)	19	36237342	35746441	38291751	3	c.84_85ins(T)	p.Leu29SerfsTer92	p.L29Sfs*92	fs	–	3	TH	F	DDD	WES & targeted	NA					34			0.02		2.904	-	-
88	PSENEN (ENST00000587708)	19	36237373	35746472	38291782	3	c.115C>T	p.Arg39Ter	p.R39*	non	–	5	DE	–	DDD	targeted	PASS	6.8411e-07	0	0	8.99284e-07	37	-		0.01	0.3	1.359	-	-
89	PSENEN (ENST00000587708)	19	36237426	35746525	38291835	3-4	c.166+2T>C	p.Gly21_Tyr56del(x3)	p.G21_Y56del(x3)	spl*	rs1970575677	5	FR	F	DDD	targeted/targeted	PASS	6.84824e-07	0	0	0	34	-		0.93	0.83	6.327	-	-
90	PSENEN (ENST00000587708)	19	36237607	35746706	38292016	3-4	c.167-2A>G	–	–	spl	rs1555738903	7	CN	F	DDD	targeted	noMatch					29.2			0.92		3.363
91	PSENEN (ENST00000587708)	19	36237610	35746709	38292019	4	c.168T>G	p.Tyr56Ter	p.Y56*	non	rs751542345	8	Jash|FR*	F	DDD|IBD|PS	targeted/targeted/RNAseq	PASS	2.05214e-06	0	0	8.99271e-07	44	-		0.3	0.29	6.343	-	-
92	PSENEN (ENST00000587708)	19	36237636	35746735	38292045	4	c.194T>G	p.Leu65Arg	p.L65R	mis	rs1555738906	7	CN	F	Com|DDD	targeted/targeted	noMatch					28.3		0.9129	0.03		3.348	0	0.619
93	PSENEN (ENST00000587708)	19	36237657	35746756	38292066	4	c.216del(C)	p.Ser73ProfsTer72	p.S73Pfs*72	fs	–	1	DE	–	DDD	targeted	NA					32			0.05		2.904	-	-
94	PSENEN (ENST00000587708)	19	36237670	35746769	38292080	4	c.228_229ins(CACC)	p.Ile77HisfsTer45	p.I77Hfs*45	fs	–	1	CN	F	PASH	targeted	NA					34			-		3.348	-	-
95	PSENEN (ENST00000587708)	19	36237671	35746770	38292081	4	[c.229_230ins(CACC)]	p.Ile77ThrfsTer45	p.I77Tfs*45	fs	–	4	CN*	F	DDD	targeted	NA					34			-		3.348	-	-
96	PSENEN (ENST00000587708)	19	36237713	35746812	38292122	4	c.271del(T)	p.Tyr91ThrfsTer54	p.Y91Tfs*54	fs	–	2	div.	F	–	WES	NA					33			0.01		1.981	-	-
97	PSENEN (ENST00000587708)	19	36237720	35746819	38292129	4	c.279del(C)	p.Phe94SerfsTer51	p.F94Sfs*51	fs	rs1555738943	9	CN	F	–	GWLS	noMatch					34			0.02		2.904	-	-
98	PSENEN (ENST00000587708)	19	36237734	35746833	38292143	4	c.292del(C)	p.Leu98TrpfsTer47	p.L98Wfs*47	fs	–	2	div.	F	–	WES	PASS	6.84116e-07	0	0	8.99302e-07	32	-		0.04	0.07	0.406	-	-
99	PSENEN (ENST00000587708)	19	36237746	35746845	38292155	4	c.304T>A	p.Ter102ArgxtTer50	p.*102Rxt*50	elg	–	3	FR*	–	DDD|Diab	targeted	NA					17.8			0		3.348	-	-
100	AIM2 (ENST00000368130)	1	159046610	159076820	158213855	5'UTR	-208A>C	–	–	–	rs41264459	0	IT	S	(PA)PASH|SAPHO	targeted	PASS	0.225806	2	0.25	0.240741	0.522	-		0	0	-2.275	-	-
101	DCD (ENST00000293371)	12	55039021	54645237	54611854	4	c.225dupA	p.Ala76SerfsTer21	p.A76Sfs*21	fs	rs538180888	0	IT	F	–	WES	PASS	0.00170261	4	0.000298704	0.00196223	6.929	-		0	0.11	-0.704	-	-
102	DEFB126 (ENST00000382398)	20	126100	145459	187910	2	c.103A>T	p.Lys35Ter	p.K35*	non	rs142956939	0	div.	F	–	WES	PASS	0.000181309	0	0	0.000222148	36	-		0.1	0.28	3.553	-	-
103	FGFR2 (ENST00000358487)	10	123325158	121565644	122461652	3	c.170C>T	p.Ser57Leu	p.S57L	mis	rs56226109	0	div.	–	–	RNAseq	PASS	0.00484991	45	0.000537634	0.00424728	21.2	0.058	0.0673	0	0.01	7.008	0.42	0
104	FGFR2 (ENST00000358487)	10	123310936	121551422	122447431	5	c.492G>C	p.Lys164Asn	p.K164N	mis	–	2	GB*	F	AC|Com	WES	NA					22.2		0.9844	0		-0.227	0	0.644
105	GJB2 (ENST00000382848)	13	20763687	20189548	19385978	2	c.34G>C	p.Gly12Arg	p.G12R	mis	rs104894408	0	US*|IT*	S	KID|FO3	targeted	noMatch					23.1		0.8512	0		2.855	0.06	-
106°	GJB2 (ENST00000382848)	13	20763691	20189552	19385977	2	c.35del(G)	p.Gly12ValfsTer2	p.G12Vfs*2	fs	rs80338939	1	IT*|FR*	S	PASH	WES	PASS	0.00713123	34	0.00128435	0.00817755	25	-		0	0.01	-1.181	-	-	100	99	1	0	100	94	6	0
107°	GJB2 (ENST00000382848)	13	20763642	20189503	19385933	2	c.79G>A	p.Val27Ile	p.V27I	mis	rs2274084	0	JP-AfUS|FR*	S	KID|FO3	targeted	PASS	0.0175723	3603	0.00221027	0.00072484	23.3	0.575	0.1108	0	0	8.903	0.12	0.998	100	98	2	0	100	100	0	0
108	GJB2 (ENST00000382848)	13	20763602	20189463	19385893	2	c.119C>T	p.Ala40Val	p.A40V	mis	–	1	US*|IT*	S	KID|FO3	targeted	NA					23		0.733	0		4.412	0.02	-
109	GJB2 (ENST00000382848)	13	20763573	20189434	19385864	2	c.148G>A	p.Asp50Asn	p.D50N	mis	rs28931594	0	AfUS|IT*	–	KID|FO3	targeted	noMatch					22.4		0.253	0		2.855	0	-
110	GJB2 (ENST00000382848)	13	20763573	20189434	19385864	2	c.148G>T	p.Asp50Tyr	p.D50Y	mis	rs28931594	0	IT*	S	KID|FO3	targeted	noMatch					22.8		0.6117	0		2.855	0.01	-
111°	GJB2 (ENST00000382848)	13	20763380	20189241	19385671	2	c.341A>G	p.Glu114Gly	p.E114G	mis	rs2274083	0	JP-AfUS|FR*	S	KID|FO3	targeted	PASS	0.00544518	595	5.97372e-05	0.000226618	20.8	0.275	0.1283	0	0	5.933	0.31	0	100	99	1	0	100	100	0	0
112°	IL1RN (ENST00000409930)	2	113890284	113132707	113559287	4	c.370G>A	p.Ala124Thr	p.A124T	mis	rs45507693	1	IT*|FR*	S	PAPASH	targeted	PASS	0.00136604	18	0.000925926	0.000384889	0.224	0.029	0.0652	0	0.01	-1.881	1	0.014	100	99	1	0	100	100	0	0
113	IRF2BP2 (ENST00000366609)	1	234744576-234744616	234608830-234608870	233999235-233999275	1	c.625_665del	p.Ala209GlnfsTer31	p.A209Qfs*31	fs	–	0	FI*	F	CVID	WES	NA					32			-		2.545	-	-
114	KDF1 (ENST00000320567)	1	27278119	26951628	26789684	2	c.753C>A	p.Phe251Leu	p.F251L	mis	rs1057519508	0	SA	F	Ectodermal Dysplasia	WES	noMatch					29.1		0.9995	0		4.481	0	0.955
115	KDF1 (ENST00000320567)	1	27278112	26951621	26789677	2	c.760C>T	p.His254Tyr	p.H254Y	mis	–	0	FR*	S	Ectodermal Dysplasia	targeted	NA					29.1		0.7506	0		4.481	0	0.97
116	~KLF5	13	74006407	73432270	72654250	–	g.73432270A>G	–	–	–	rs17090189	0	US*	FS	diverse	GWAS/WGS	PASSgenome	0.1883	2900	0.2511	0.1607	6.53				0	-0.539
116	LINC00393 (ENST00000443621)	13	74006407	73432270	72654250	1-2	g.73432270A>G	–	–	–	rs17090189	0	US*	FS	diverse	GWAS/WGS	PASSgenome	0.1883	2900	0.2511	0.1607	6.53				0	-0.539
117	KRT6A (ENST00000330722)	12	52882146	52488362	52452958	7	c.1390A>C	p.Thr464Pro	p.T464P	mis	rs61293647	1	ES*	S	PC	targeted	noMatch					25.9		0.9587	0.01		3.02	0	0.999
118	KRT17 (ENST00000311208)	17	39780487	41624235	42479688	1	c.275A>G	p.Asn92Ser	p.N92S	mis	rs59151893	0	IT*	F	FO4|PC	targeted	noPASS	0	0	0	0	26.2	0.909	0.8458	0	0.01	4.706	0.02	0.718
119	KRT17 (ENST00000311208)	17	39780478	41624226	42479679	1	c.284T>C	p.Leu95Pro	p.L95P	mis	rs28928899	0	CN*	S	FO4|PC|AS	WES	noMatch					32		0.998	0		3.37	0	1
120	MEFV (ENST00000219596)	16	3304338	3254338	3281394	2	c.730G>A	p.Glu244Lys	p.E244K	mis	rs1959081392	0	ES	S	PAAND	WGS	noMatch					23.6		0.1585	0.19		2.907	0.05	0.136
121°	MEFV (ENST00000219596)	16	3304626	3254626	3281682	2	c.442G>C	p.Glu148Gln	p.E148Q	mis	rs3743930	0	TR|FR*	FS	FMF|Pilonidal sinus	targeted	PASS	0.0376983	5437	0.0170601	0.0130745	22.6	0.274	0.1324	0	0.01	5.721	0.03	0.851	100	87	10	3	100	99	1	0
122	MEFV (ENST00000219596)	16	3299675	3249675	3276731	3	c.1016C>T	p.Ser339Phe	p.S339F	mis	rs104895157	0	TR	S	–	targeted	PASS	0.000217708	0	5.97621e-05	0.000252893	21.7	0.272	0.1239	0.01	0.02	4.234	0.07	0.817
123°	MEFV (ENST00000219596)	16	3299586	3249586	3276642	3	c.1105C>T	p.Pro369Ser	p.P369S	mis	rs11466023	0	TR|FR*	S	Robinow	targeted	PASS	0.0103327	215	0.00406213	0.00738846	22.7	0.242	0.0908	0.01	0.01	1.315	0.07	0.503	100	97	3	0	100	99	1	0
124°	MEFV (ENST00000219596)	16	3299468	3249468	3276524	3	c.1223G>A	p.Arg408Gln	p.R408Q	mis	rs11466024	0	TR|FR*	S	Robinow	targeted	PASS	0.00990678	165	0.00406213	0.00739478	3.595	0.035	0.0938	0.23	0.08	-0.039	0.33	0.045	100	97	3	0	100	99	1	0
125°	MEFV (ENST00000219596)	16	3293880	3243880	3270940	9	c.1772T>C	p.Ile591Thr	p.I591T	mis	rs11466045	0	IT*|FR*	S	PASH	targeted	PASS	0.0149801	186	0.00235962	0.0172862	0.229	0.169	0.0576	0.01	0.02	-3.125	0.55	0	100	100	0	0	100	98	2	0
126	MEFV (ENST00000219596)	16	3293447	3243447	3270507	10	c.2040G>[ACT]	p.Met680Ile	p.M680I	mis	rs28940580	1	TR	FS	PS|SAPHO	targeted	PASS	1.1629e-05	0	0	8.99271e-06	1.95	0.35	0.2569	0	0.01	0.564	0.45	0.001
127	MEFV (ENST00000219596)	16	3293407	3243407	3270467	10	c.2080A>G	p.Met694Val	p.M694V	mis	rs61752717	1	MD|TR	FS	PAPASH|FMF|FO3	targeted/targeted/WES	PASS	0.000181273	3	2.98686e-05	0.000150178	8.997	0.406	0.1461	0	0.01	1.239	0.15	0.281
128	MEFV (ENST00000219596)	16	3293403	3243403	3270463	10	c.2084A>G	p.Lys695Arg	p.K695R	mis	rs104895094	0	div.	–	–	RNAseq	PASS	0.00385874	48	0.000388292	0.00370769	14.3	0.353	0.0869	0	0.01	0.225	0.3	0.683
129	MEFV (ENST00000219596)	16	3293310	3243310	3270370	10	c.2177T>C	p.Val726Ala	p.V726A	mis	rs28940579	4	AM|MD|TR	FS	PAPASH|FO3|FMF	targeted/targeted/targeted/RNAseq/WES	PASS	0.00129695	23	8.96057e-05	0.00046852	0.317	0.35	0.0578	0	0	1.082	1	0.001
130	NBPF12 (ENST00000698835)	1	146395465	146960267	147848164	7	c.124T>A	p.Cys42Ser	p.C42S	mis	rs1345358545	0	div.	F	–	WES	noPASS	7.73367e-05	0	0	4.57662e-05	14.75	-	noMane	0	0	0.056	0	0.975
131	NF1P6 (ENST00000426025)	22	16350245	15627718	16201695	4-5	n.602-2C>A	–	–	spl	rs776018604	0	div.	F	–	WES	noPASS	0	0	0	0	22.6	-		-	-	0.78	-	-
132	NLRC4 (ENST00000402280)	2	32476392	32251323	32299833	4	c.541C>T	p.Arg181Ter	p.R181*	non	rs759551435	1	IT*	S	PAPASH	WES	PASS	6.84053e-06	0	0	5.3957e-06	36	-		0.29	0.28	0.831	-	-
133	NLRC4 (ENST00000402280)	2	32460584	32235515	32284020	8	c.2668T>C	p.Cys890Arg	p.C890R	mis	rs544969923	1	IT*	S	PASH/SAPHO	WES	PASS	0.00101446	27	2.98704e-05	1.16908e-05	0.9	0.044	noMane	0.01	0	-2.201	0.61	0.001
134°	NLRP3 (ENST00000336119)	1	247588858	247425556	246862045	4	c.2107C>A	p.Gln703Lys	p.Q703K	mis	rs35829419	1	IT*|FR*	S	PASH	targeted	PASS	0.044378	1610	0.00929079	0.047966	0.438	0.162	noMane	0.06	0.02	0.338	0.63	0.01	100	91	9	0	100	92	8	0
135	NOD2 (ENST00000647318)	16	50733743	50699832	56497466	2	c.337G>A	p.Ala113Thr	p.A113T	mis	rs34684955	0	div.	–	–	RNAseq	PASS	0.0006296	9	0.0231794	6.29538e-06	15.33	-	noMane	0	0	4.023	0.42	0.114
136	NOD2 (ENST00000647318)	16	50744877	50710966	56508600	4	c.974A>G	p.His325Arg	p.H325R	mis	rs5743272	0	div.	–	–	RNAseq	PASS	0.000405639	2	0.0118578	8.63303e-05	22.8	-	noMane	0	0.02	3.626	0	0.254
137	NOD2 (ENST00000647318)	16	50745443	50711532	56509166	4	c.1540C>T	p.Arg514Trp	p.R514W	mis	rs576658764	0	div.	–	–	RNAseq	PASS	8.35291e-05	0	0	5.39581e-05	21.6	-	noMane	0	0.02	0.713	0	0.628
138°	NOD2 (ENST00000647318)	16	50745926	50712015	56509649	4	c.2023C>T	p.Arg675Trp	p.R675W	mis	rs2066844	2	IT*|FR*	S	PASH	targeted/WES	PASS	0.0395552	1586	0.00654161	0.047824	23.6	-	noMane	0	0	3.403	0.01	0.72	100	92	8	0	100	89	11	0
139	NOD2 (ENST00000647318)	16	50745945	50712034	56509668	4	c.2042G>A	p.Arg681His	p.R681H	mis	rs35285618	0	div.	–	–	RNAseq	PASS	0.00071951	7	0.0201637	0.000228451	22.4	-	noMane	0	0	1.511	0.26	0.766
140°	NOD2 (ENST00000647318)	16	50745996	50712085	56509719	4	c.2093C>G	p.Ala698Gly	p.A698G	mis	rs5743278	0	FR*	S	–	RNAseq	PASS	0.00142944	55	0.05069	7.37445e-05	12.51	-	noMane	0.02	0.04	3.33	0.2	0.015	100	97	3	0	100	100	0	0
141°	NOD2 (ENST00000647318)	16	50746191	50712280	56509914	4	c.2288G>A	p.Arg763Gln	p.R763Q	mis	rs5743279	0	FR*	S	–	RNAseq	PASS	0.000940754	19	0.0339307	2.51796e-05	3.636	-	noMane	0	0.01	-0.273	0.25	0.003	100	99	1	0	100	100	0	0
142	NOD2 (ENST00000647318)	16	50756540	50722629	56520263	8	c.2641G>C	p.Gly881Arg	p.G881R	mis|spl	rs2066845	3	IT*	S	PASH	targeted/WES	PASS	0.0131487	236	0.00227001	0.0141051	27.4	-	noMane	0	0	6.941	0	0.986
143°	NOD2 (ENST00000647318)	16	50756571	50722660	56520294	8	c.2672C>A	p.Ala891Asp	p.A891D	mis	rs104895452	0	FR*	S	–	RNAseq	PASS	0.000436425	2	8.96057e-05	0.000342627	25.5	-	noMane	0	0	8.792	0	1	100	98	2	0	100	100	0	0
144	NOD2 (ENST00000647318)	16	50759440	50725529	56523162	10	c.2842C>G	p.Leu948Val	p.L948V	mis	rs1337759230	1	AM	F	FO3	targeted	PASS	2.73634e-06	0	0	2.69793e-06	22.8	-	noMane	0	0	8.87	0.01	0.988
145°	NOD2 (ENST00000647318)	16	50763779	50729868	56527502	11	c.2938dup(C)	p.Leu980ProfsTer2	p.L980Pfs*2	fs	rs2066847	1	IT*|FR*	S	PASH	RNAseq/WES	PASS	0.0184701	577	0.00236131	0.0215445	33	-		0.05	0.09	2.419	-	-	100	98	2	0	100	95	5	0
146	NOTCH1 (ENST00000651671)	9	139405104	136510652	148739751	17-18	c.2740+1G>T	–	–	spl	–	0	AfUS	–	Keratoacanthoma	targeted	NA					32			1		2.708
147°N	NOTCH3 (ENST00000263388)	19	15308382	15197571	15322485	2	c.125dup(C)	p.Cys43LeufsTer32	p.C43Lfs*32	fs	rs749829137	0	FR*	S	–	WES	PASS	2.05572e-06	0	0	1.79898e-06	29.5	-		0.06	0.05	0.089	-	-	100	99	1	0	100	100	0	0
148	NOTCH3 (ENST00000263388)	19	15302941	15192130	15317047	4	c.509A>G	p.His170Arg	p.H170R	mis	rs147373451	0	div.	F	–	WES	PASS	0.00302729	11	0.000567537	0.00338671	24.9	0.601	0.1053	0.01	0.01	0.135	0.01	0.777
149	NOTCH3 (ENST00000263388)	19	15297709	15186898	15311815	12	c.1931T>A	p.Val644Asp	p.V644D	mis	rs148046938	0	div.	F	–	WES	PASS	0.000904332	1	0.000238949	0.00107195	24.6	0.667	0.175	0	0	6.327	0.15	0.962
150	NOTCH2NLA (ENST00000362074)	1	145248811	146189383	146148205	1-2	c.-44-2A>G	–	–	spl	rs3872062	0	div.	F	–	WES	noMatch					28.1			-		3.099
151	OCRL (ENST00000371113)	X	128696373	129562396	127881181	11	c.952C>T	p.Arg318Cys	p.R318C	mis	rs137853263	1	IT*	F	DD2	targeted	noMatch					27.1		0.8417	0.08		5.553	0	-
152	OCRL (ENST00000371113)	X	128703251	129569274	127888059	15	c.1477C>T	p.Arg493Trp	p.R493W	mis	rs137853846	1	IT*	–	DD2	targeted	noMatch					26		0.9858	0		1.298	0	-
153	OCRL (ENST00000371113)	X	128703341	129569364	127888149	15	c.1567G>A	p.Asp523Asn	p.D523N	mis	–	1	IT*	F	DD2	targeted	NA					26.5		0.9939	0		3.717	0	-
154	OTULIN (ENST00000284274)	5	14673807	14673698	14613190	2	c.209T>C	p.Ile70Thr	p.I70T	mis	rs745829522	1	IT*	S	PASH	WES	PASS	2.0528e-06	0	0	1.79891e-06	18.22	0.046	0.143	0	0	2.998	0.69	0.001
155°	OTULIN (ENST00000284274)	5	14681593	14681484	14620975	4	c.345G>T	p.Gln115His	p.Q115H	mis	rs147790160	1	IT*|FR*	S	PASH	WES	PASS	0.00665427	69	0.00137716	0.0066104	15.7	0.023	0.1582	0	0.08	4.877	0.62	0.011	100	98	2	0	100	97	3	0
156	POFUT1 (ENST00000375749)	20	30804411	32216608	33940529	3-4	c.430-1G>A	–	–	spl	rs958172940	4	ES*	S	DDD	targeted	noMatch					34			0.66		4.494
157	POFUT1 (ENST00000375749)	20	30818777	32230974	33954891	6	c.891G>A	p.Trp297Ter	p.W297*	non	–	1	ES*	F	DDD	WES	PASS	1.36809e-06	0	0	8.99272e-07	39	-		0	0.03	6.96	-	-
158	POGLUT1 (ENST00000295588)	3	119209414	119490567	122210282	9	c.814C>T	p.Arg272Ter	p.R272*	non	rs747897279	1	FR*	F	DDD	targeted	PASS	8.20933e-06	0	0	5.3961e-06	41	-		0.04	0.26	5.964	-	-
159	PSTPIP1 (ENST00000558012)	15	77287491	76995150	74854303	5'	c.-421CCTG[6] [5 to 6 rep]	–	–	µsat	rs55909412	0	DE	S	PASH	targeted	PASS	0.0749844	2592	0.0351377	0.0771243	15.35	-		0	0	1.092	-	-
160	PSTPIP1 (ENST00000558012)	15	77287491	76995150	74854303	5'	c.-421CCTG[8] [5 to 8 rep]	–	–	µsat	rs55909412	3	TR|RU|FR*	FS	(PA)PASH, PCAS	targeted/targeted/targeted	noPASS	0.15197	10633	0.0412988	0.152293	15.12	-		0	0.01	1.092	-	-
161	PSTPIP1 (ENST00000558012)	15	77324645	77032304	74891453	11	c.748G>C	p.Glu250Gln	p.E250Q	mis	rs28939089	1	DE*	F	PAPASH	targeted	noMatch					31		0.7266	0.09		4.42	0	1
162	PSTPIP1 (ENST00000558012)	15	77324661	77032320	74891469	11	c.764C>T	p.Thr255Met	p.T255M	mis	rs766895096	1	FI*	–	Diab|PG|UC	targeted	PASS	0.000149979	0	5.97514e-05	0.000190699	20.5	-	0.0783	0	0	2.339	0.06	0.584
163°	PSTPIP1 (ENST00000558012)	15	77324670	77032329	74891478	11	c.773G>C	p.Gly258Ala	p.G258A	mis	rs34240327	0	div.|FR*	S	–	RNAseq	PASS	0.00368229	55	0.0377652	0.00131149	16.03	-	0.0789	0	0	4.161	0.84	0.114	100	96	4	0	100	100	0	0
164	PSTPIP1 (ENST00000558012)	15	77324728	77032387	74891536	11	c.831G>T	p.Glu277Asp	p.E277D	mis	rs990986006	5	MD	S	PAPASH/FMF	targeted/targeted/WES	PASS	8.90237e-06	0	0	8.09539e-06	15.44	-	0.1082	0	0	4.139	0.46	0.218
165	PSTPIP1 (ENST00000558012)	15	77324780	77032439	74891588	12-13	c.838+45C>[AGT]	–	–	int	rs116895455	0	SG	FS	–	targeted/Assoc	PASS	3.81278e-05	0	3.02737e-05	6.38053e-06	0.822	-		0.04	0.02	0.293	-	-
166	PSTPIP1 (ENST00000558012)	15	77328191	77035850	74894999	14	c.1034A>G	p.Tyr345Cys	p.Y345C	mis	rs1192521928	3	JP	F	PASH	targeted	PASS	9.5981e-06	0	0	0	25.9	-	0.1509	0	0.04	6.18	0	0.975
167°	PSTPIP1 (ENST00000558012)	15	77328269	77035928	74895077	14	c.1112C>T	p.Thr371Ile	p.T371I	mis|spl	rs34908107	0	div.|FR*	FS	diverse	Burden/targeted	PASS	0.000391073	2	0.0124729	3.96999e-05	7.383	-	0.0892	0	0.02	0.298	0.05	0.076	100	99	1	0	100	100	0	0
168	PSTPIP1 (ENST00000558012)	15	77329359	77037018	74896167	14-15	c.1120-27G>[AC]	–	–	int	rs766351379	0	SG	FS	–	targeted/Assoc	PASS	1.2353e-05	0	0	7.20853e-06	1.586	-		0	0	0.058	-	-
169°	PSTPIP1 (ENST00000558012)	15	77329410	77037069	74896218	15	c.1144G>A	p.Ala382Thr	p.A382T	mis	rs145344175	0	div.|FR*	FS	diverse	Burden/targeted	PASS	0.000467135	6	0.0165492	3.95823e-05	8.305	-	0.0717	0	0.01	2.149	0.54	0.018	100	99	1	0	100	100	0	0
170	PSTPIP1 (ENST00000558012)	15	77329474	77037133	74896282	15	c.1208G>A	p.Gly403Glu	p.G403E	mis	rs201572812	0	div.	FS	diverse	Burden/targeted	PASS	0.000487033	3	5.97443e-05	0.000593711	26.4	-	0.2393	0	0.01	8.66	0	0.934
171	PSTPIP1 (ENST00000558012)	15	77329479	77037138	74896287	15	c.1213C>T	p.Arg405Cys	p.R405C	mis	rs201253322	4	div.|ES*	FS	PASH	Burden/targeted	PASS	0.000607732	1	0.000268881	0.000675649	22.5	-	0.1075	0	0.05	4.887	0.13	0.098
172	PSTPIP1 (ENST00000558012)	15	77329487	77037146	74896295	15	c.1221C>A	p.Phe407Leu	p.F407L	mis	rs200363654	0	SG	FS	–	targeted/Assoc	PASS	0.000128847	0	0	0	0.443	-	0.8941	0	0.13	-2.981	1	0.007
173°	PSMB8 (ENST00000374882)	6	32811752	32843975	32665350	1	c.22G>A	p.Gly8Arg	p.G8R	mis	rs114772012	0	IT*|FR*	S	AS|PASH|SAPHO	targeted	PASS	0.0204177	346	0.0260171	0.0210312	22.9	0.075	0.2131	0.03	0.08	3.561	0.04	0.068	100	95	5	0	100	97	2	1
174°	RORC (ENST00000318247)	1	151804213	151831737	150955242	1	c.28C>T	p.Arg10Ter	p.R10*	non	rs17582155	0	div.|FR*	F	–	WES	PASS	0.00279144	10	0.000388361	0.00335626	36	-		0.01	0.06	3.395	-	-	100	98	2	0	100	100	0	0
175	SLC46A2 (ENST00000374228)	9	115652546	112890266	125061712	1	c.412dup(G)	p.Ala139GlyfsTer39	p.A139Gfs*39	fs	–	0	div.	F	–	WES	NA					29.1			0.02		2.821	-	-
176°N	SLC46A2 (ENST00000374228)	9	115651985	112889705	125061151	1	c.973_976dup(GCTG)	p.Ala326GlyfsTer133	p.A326Gfs*133	fs	rs1841700210	0	FR*	S	–	WES	PASS	1.16322e-05	0	0	1.25909e-05	32	-		0.16	0.16	4.785	-	-	100	99	1	0	100	100	0	0
177	~SOX9	17	69512099	71515958	72388579	–	g.71515958G>A	–	–	–	rs10512572	0	US*	FS	diverse	GWAS/WGS	PASSgenome	0.1717	3151	0.2089	0.1052	9.95					0.334
178	TCIRG1 (ENST00000265686)	11	67811674	68044207	68047849	9	c.883C>T	p.Gln295Ter	p.Q295*	non	–	0	div.	F	–	WES	noPASS	0	0	0	0	36	-		0.02	0.05	6.948	-	-
179°	WDR1 (ENST00000499869)	4	10089539	10087915	10087502	8	c.743A>G	p.His248Arg	p.H248R	mis	rs41268387	1	IT*|FR*	S	PASH/SAPHO	WES	PASS	0.00702924	64	0.00103106	0.0063216	19.01	0.067	noMane	0.04	0	3.744	0.37	0.001	100	98	2	0	100	99	1	0

## Sheet: HeaderExplanations
varID	Variant ID - corresponding to the .vcf file included with this article
geneName	Official gene name and ENST identifier of the considered MANE transcript
chromosome	Chromosome name
GRCh37_position	Position on GRCh37 human genome
GRCh38_position	Position on GRCh38 human genome
T2T_position	Position on CHM13v2.0 (T2T-hs1) human genome
exon	Exon concerned by the variant
c.HGVS	Coding HGVS code
p.HGVS	Protein HGVS code
p.HGVS	Simplified protein HGVS code
effect	Variant effect : del (deletion), elg (elongation), fs (frameshift), int (intronic), mis (missense), non (nonsense), spl (splicing site), spl* (known splicing effect of the variant), utr (untranslated region variant), and µsat (microsatellite)
rsID	dbSNP identifier (if known - depending of dbSNP versions)
nbReviews	Number of reviews (out of 11) that mention this variant
origin	Country where the variant was identified (or country inferred based on the origin of the authors) - 2-letter country code used here
sporadicORfamilial	Sporadic or familial case
comorbidities	Comorbidities or syndromes mentioned in articles
technology	Technologies used to identify the variant : WES, WGS, GWAS, targeted exome sequencing, variant calling on RNAseq data …
gnomAD	gnomAD (v4.1) explanations : PASS (PASS in exome gnomAD), noPASS (noPASS in exome gnomAD), PASSgenome (noPASS or NA in exome BUT PASS in genome gnomAD), NA (not known in gnomAD), noMatch (not known in gnomAD BUT known with and dbSNP identifier)
AF-ALL	Allele frequency (global population)
nhomalt	Number of homozygous alt
AF-AFR	Allele frequency (african population)
AF-NFE	Allele frequency (non-Finnish european)
CADD	CADD Phred-like score
Revel	REVEL score
AlphaMissense	AlphaMissense score
SpliceAI	SpliceAI worst score
Pangolin	Pangolin worst score
PhyloP	PhyloP (mammals) score
SIFT	SIFT score
PolyPhen-2	PolyPhen-2 score
Hstot	Number of HS individuals observed
Hsref	Number of HS individuals with ref/ref alleles
Hsalt(het)	Number of HS individuals with alt/ref alleles
Hsalt(hom)	Number of HS individuals with alt/alt alleles
Ctltot	Number of control individuals observed
Ctlref	Number of control individuals with ref/ref alleles
Ctlalt(het)	Number of control individuals with alt/ref alleles
Ctlalt(hom)	Number of control individuals with alt/alt alleles
