# Supplementary material for: Comprehensive Catalog of Variants Potentially Associated with Hidradenitis Suppurativa, Including Newly Identified Variants from a Cohort of 100 Patients
Source: Preprints.org preprint supplement (doi:10.20944/preprints202408.0431.v1), 2024-08-07
Supplement: Supplementary file 2 [file supplementary]

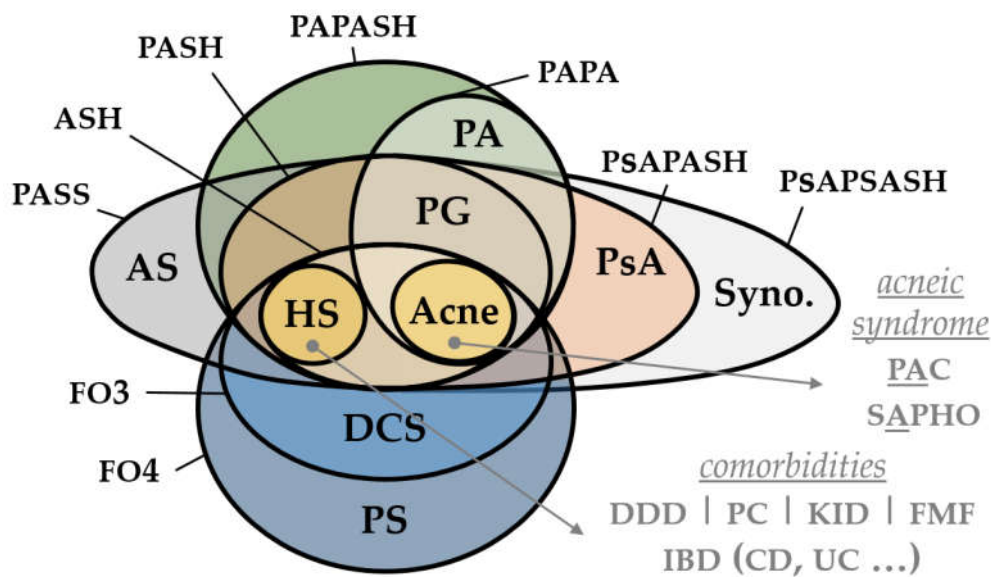

**Scheme 1.** Comorbidities of HS and its involvement in various autoinflammatory syndromes [4–8]. Diseases and syndromes: AS: ankylosing spondyloarthritis; ASH: acne, hidradenitis suppurativa; CD: Crohn’s disease; DCS: dissecting cellulitis of the scalp; DDD: Dowling-Degos disease; FMF: familial Mediterranean fever; FO3: follicular occlusion triad (hidradenitis suppurativa, acne conglobata, dissecting cellulitis of the scalp); FO4: follicular occlusion tetrad (hidradenitis suppurativa, acne conglobata, dissecting cellulitis of the scalp and pilonidal sinus); HS: hidradenitis suppurativa; IBD: inflammatory bowel disease; KID: keratitis, ichthyosis, deafness; PA: pyogenic arthritis; PAC: pyoderma gangrenosum, acne, ulcerative colitis; PAPA: pyogenic arthritis, pyoderma gangrenosum, acne; PASH: pyoderma gangrenosum, acne, hidradenitis suppurativa; PAPASH: pyogenic arthritis, pyoderma gangrenosum, acne, hidradenitis suppurativa; PASS: pyoderma gangrenosum, acne, hidradenitis suppurativa, ankylosing spondyloarthritis; PC: pachyonychia congenita; PG: pyoderma gangrenosum; PS: pilonidal sinus; PsA: psoriatic arthritis; PsAPASH: psoriatic arthritis, pyoderma gangrenosum, acne, hidradenitis suppurativa; SAPHO: synovitis, acne, pustulosis, hyperostosis, osteitis; Syno.: synovitis; UC: ulcerative colitis.

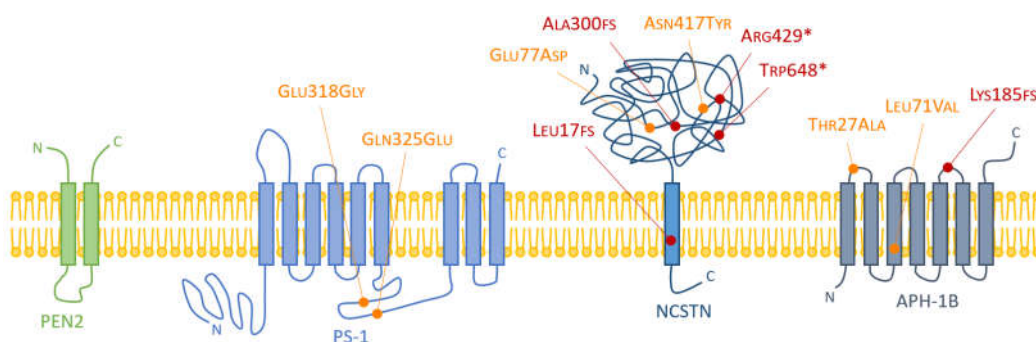

**Scheme 2.** All  $\gamma$ -secretase exonic variants identified in our HS1 & HS2 cohorts. In orange and red, variants with moderate and strong impacts. FS: frameshift variant; \*: nonsense variant.

**Supplementary Table 1.** Complete table of all 179 variants found in the literature, including our new variants.

Table in the other document

**Supplementary Table 2.** Example of a mutation presented in 9 distinct articles.

| Article         | MANE Transcript                    | Exon     | Genome | Position    | c.HGVS           | p.HGVS             |
|-----------------|------------------------------------|----------|--------|-------------|------------------|--------------------|
| [72]            | <b>NM_001290184</b>                | <b>4</b> | -      | -           | <b>c.218delC</b> | <b>p.P73Lfs*15</b> |
| [71]            | <b>NM_015331</b>                   | <b>3</b> | -      | -           | <b>c.278delC</b> | <b>p.P93Lfs*15</b> |
| [116]           | -                                  | -        | -      | -           | c.218delC        | -                  |
| [78]            | -                                  | 4        | -      | -           | c.218delC        | p.P73Lfs*15        |
| [59]            | -                                  | -        | -      | -           | c.218delC        | p.I73Tfs*3         |
| [115]           | -                                  | -        | -      | -           | c.218delC        | p.P73Lfs*15        |
| [114]           | -                                  | 4        | -      | -           | c.218delC        | p.P73Lfs*15        |
|                 | -                                  | -        | -      | -           | c.278delC        | p.P93Lfs*15        |
| [13]            | -                                  | 3        | -      | -           | c.218delC        | p.P93Lfs*15        |
|                 | -                                  | 3        | -      | -           | c.278delC        | p.P93Lfs*15        |
| [119]           | -                                  | -        | -      | -           | c.218delC        | p.P73Lfs*15        |
|                 | -                                  | -        | -      | -           | c.278delC        | p.P93Lfs*15        |
| Current article | ENST00000029478<br>5 (= NM_015331) | 3        | GRCh38 | 1:160349086 | c.278delC        | p.P93Lfs*15        |

The first two lines in **bold** represent the two original articles from 2018 reporting first this mutation. The dashes indicate missing data that would have been helpful for tracking the mutation over the past five years. This example illustrate a deletion in *NCSTN* described simultaneously in 2018 in two independent articles and in different patients. The annotations differ: the first laboratory reports a c.218delC mutation (p.P73Lfs\*15) on the NM\_001290184 transcript affecting exon 4 [35] while the second laboratory reports a c.278delC mutation (p.P93Lfs\*15) on the NM\_015331 transcript affecting exon 3 [34]. Although both annotations are technically correct, they initially appear to describe distinct mutations. However, subsequent reviews have removed the transcript details, altered the protein HGVS code (p.P73Lfs\*15 → p.I73Tfs\*3 → p.P93Lfs\*15), introduced new errors regarding the exon (4 → 3), and included the mutations separately, despite them being the same mutation. This highlights the importance of clarifying such details, always specifying the reference transcript (preferably using the standard MANE transcript) or at least the genome version and variant position. Errors are common in such catalogs, and we hope this revised version will facilitate future research on HS.

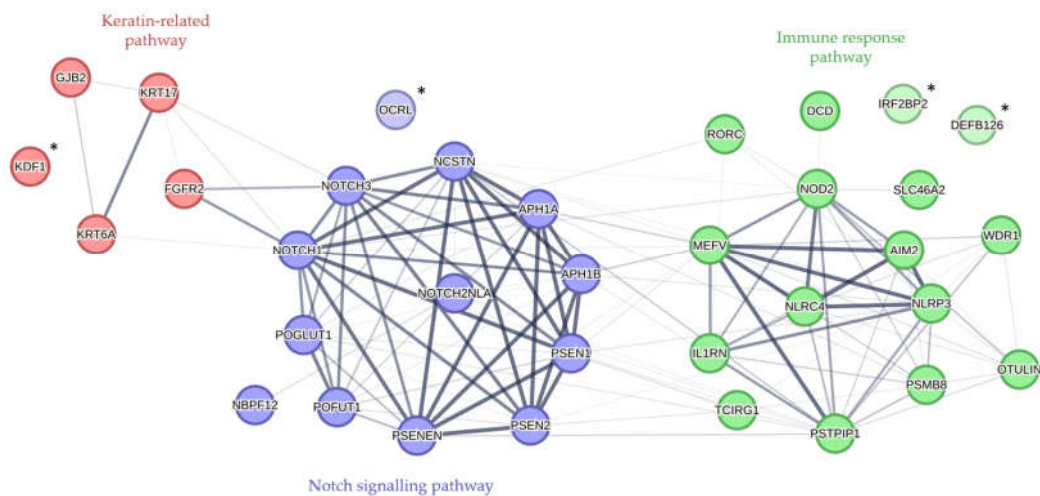

**Supplementary Figure 3.** Protein network of all genes discussed in this article, according to STRING (v. 12.0). Three clusters are identified: the Notch signalling pathway, the immune response pathway and keratinization (consistent with Jfri et al. [118]). The interaction score is set to 0.150 to enhance sensitivity over specificity. The thicker the edges, the stronger the connections

within the clusters. (\*) indicates genes not connected to the network but guilt-by-association [120–122].

**Supplementary Table 3.** Additional polymorphisms in other genes associated with HS (78) in the literature, including the two new variants identified in our cohort.

| Gene                           | ID   | Position (GRCh38)     | Ex.       | c/p.HGVS      | Eff. | rsID         | R. | Or.         | F/S | Asso.                   |
|--------------------------------|------|-----------------------|-----------|---------------|------|--------------|----|-------------|-----|-------------------------|
| AIM2<br>(ENST00000368130)      | 100  | 1:159076820           | 5'UT<br>R | -208A>C       | –    | rs41264459   | 0  | IT          | S   | (PA)PASH SA<br>PHO      |
| DCD<br>(ENST00000293371)       | 101  | 12:54645237           | 4         | p.A76Sfs*21   | fs   | rs538180888  | 0  | IT          | F   | –                       |
| DEFB126<br>(ENST00000382398)   | 102  | 20:145459             | 2         | p.K35*        | non  | rs142956939  | 0  | div.        | F   | –                       |
| FGFR2<br>(ENST00000358487)     | 103  | 10:121565644          | 3         | p.S57L        | mis  | rs56226109   | 0  | div.        | –   | –                       |
|                                | 104  | 10:121551422          | 5         | p.K164N       | mis  | –            | 2  | GB*         | F   | AC Com                  |
| GJB2<br>(ENST00000382848)      | 105  | 13:20189548           | 2         | p.G12R        | mis  | rs104894408  | 0  | US* IT*     | S   | KID FO3                 |
|                                | 106° | 13:20189552           | 2         | p.G12Vfs*2    | fs   | rs80338939   | 1  | IT* FR*     | S   | PASH                    |
|                                | 107° | 13:20189503           | 2         | p.V27I        | mis  | rs2274084    | 0  | JP-AfUS FR* | S   | KID FO3                 |
|                                | 108  | 13:20189463           | 2         | p.A40V        | mis  | –            | 1  | US* IT*     | S   | KID FO3                 |
|                                | 109  | 13:20189434           | 2         | p.D50N        | mis  | rs28931594   | 0  | AfUS IT*    | –   | KID FO3                 |
|                                | 110  | 13:20189434           | 2         | p.D50Y        | mis  | rs28931594   | 0  | IT*         | S   | KID FO3                 |
|                                | 111° | 13:20189241           | 2         | p.E114G       | mis  | rs2274083    | 0  | JP-AfUS FR* | S   | KID FO3                 |
| IL1RN<br>(ENST00000409930)     | 112° | 2:113132707           | 4         | p.A124T       | mis  | rs45507693   | 1  | IT* FR*     | S   | PAPASH                  |
| IRF2BP2<br>(ENST00000366609)   | 113  | 1:234608830-234608870 | 1         | p.A209Qfs*31  | fs   | –            | 0  | FI*         | F   | CVID                    |
| KDF1<br>(ENST00000320567)      | 114  | 1:26951628            | 2         | p.F251L       | mis  | rs1057519508 | 0  | SA          | F   | Ectodermal<br>Dysplasia |
|                                | 115  | 1:26951621            | 2         | p.H254Y       | mis  | –            | 0  | FR*         | S   | Ectodermal<br>Dysplasia |
| ~KLF5                          |      |                       | –         |               | –    |              |    |             |     |                         |
| LINC00393<br>(ENST00000443621) | 116  | 13:73432270           | 1-2       | g.73432270A>G | int  | rs17090189   | 0  | US*         | FS  | diverse                 |
| KRT6A<br>(ENST00000330722)     | 117  | 12:52488362           | 7         | p.T464P       | mis  | rs61293647   | 1  | ES*         | S   | PC                      |
|                                | 118  | 17:41624235           | 1         | p.N92S        | mis  | rs59151893   | 0  | IT*         | F   | FO4 PC                  |

|                             |      |                 |     |             |             |                  |   |              |    |                        |
|-----------------------------|------|-----------------|-----|-------------|-------------|------------------|---|--------------|----|------------------------|
| KRT17<br>(ENST00000311208)  | 119  | 17:4162422<br>6 | 1   | p.L95P      | mis         | rs28928899       | 0 | CN*          | S  | FO4 PC AS              |
|                             | 120  | 16:3254338      | 2   | p.E244K     | mis         | rs19590813<br>92 | 0 | ES           | S  | PAAND                  |
|                             | 121° | 16:3254626      | 2   | p.E148Q     | mis         | rs3743930        | 0 | TR FR<br>*   | FS | FMF Pilonidal<br>sinus |
|                             | 122  | 16:3249675      | 3   | p.S339F     | mis         | rs10489515<br>7  | 0 | TR           | S  | –                      |
|                             | 123° | 16:3249586      | 3   | p.P369S     | mis         | rs11466023       | 0 | TR FR<br>*   | S  | Robinow                |
| MEFV<br>(ENST00000219596)   | 124° | 16:3249468      | 3   | p.R408Q     | mis         | rs11466024       | 0 | TR FR<br>*   | S  | Robinow                |
|                             | 125° | 16:3243880      | 9   | p.I591T     | mis         | rs11466045       | 0 | IT* F<br>R*  | S  | PASH                   |
|                             | 126  | 16:3243447      | 10  | p.M680I     | mis         | rs28940580       | 1 | TR           | FS | PS SAPHO               |
|                             | 127  | 16:3243407      | 10  | p.M694V     | mis         | rs61752717       | 1 | MD T<br>R    | FS | PAPASH FMF<br> FO3     |
|                             | 128  | 16:3243403      | 10  | p.K695R     | mis         | rs10489509<br>4  | 0 | div.         | –  | –                      |
|                             | 129  | 16:3243310      | 10  | p.V726A     | mis         | rs28940579       | 4 | AM M<br>D TR | FS | PAPASH FO3 <br>FMF     |
| NBPF12<br>(ENST00000698835) | 130  | 1:14696026<br>7 | 7   | p.C42S      | mis         | rs13453585<br>45 | 0 | div.         | F  | –                      |
| NF1P6<br>(ENST00000426025)  | 131  | 22:1562771<br>8 | 4-5 | n.602-2C>A  | spl         | rs77601860<br>4  | 0 | div.         | F  | –                      |
| NLRC4<br>(ENST00000402280)  | 132  | 2:32251323      | 4   | p.R181*     | non         | rs75955143<br>5  | 1 | IT*          | S  | PAPASH                 |
|                             | 133  | 2:32235515      | 8   | p.C890R     | mis         | rs54496992<br>3  | 1 | IT*          | S  | PASH/SAPHO             |
| NLRP3<br>(ENST00000336119)  | 134° | 1:24742555<br>6 | 4   | p.Q703K     | mis         | rs35829419       | 1 | IT* F<br>R*  | S  | PASH                   |
|                             | 135  | 16:5069983<br>2 | 2   | p.A113T     | mis         | rs34684955       | 0 | div.         | –  | –                      |
|                             | 136  | 16:5071096<br>6 | 4   | p.H325R     | mis         | rs5743272        | 0 | div.         | –  | –                      |
|                             | 137  | 16:5071153<br>2 | 4   | p.R514W     | mis         | rs57665876<br>4  | 0 | div.         | –  | –                      |
|                             | 138° | 16:5071201<br>5 | 4   | p.R675W     | mis         | rs2066844        | 2 | IT* F<br>R*  | S  | PASH                   |
|                             | 139  | 16:5071203<br>4 | 4   | p.R681H     | mis         | rs35285618       | 0 | div.         | –  | –                      |
| NOD2<br>(ENST00000647318)   | 140° | 16:5071208<br>5 | 4   | p.A698G     | mis         | rs5743278        | 0 | FR*          | S  | –                      |
|                             | 141° | 16:5071228<br>0 | 4   | p.R763Q     | mis         | rs5743279        | 0 | FR*          | S  | –                      |
|                             | 142  | 16:5072262<br>9 | 8   | p.G881R     | mis s<br>pl | rs2066845        | 3 | IT*          | S  | PASH                   |
|                             | 143° | 16:5072266<br>0 | 8   | p.A891D     | mis         | rs10489545<br>2  | 0 | FR*          | S  | –                      |
|                             | 144  | 16:5072552<br>9 | 10  | p.L948V     | mis         | rs13377592<br>30 | 1 | AM           | F  | FO3                    |
|                             | 145° | 16:5072986<br>8 | 11  | p.L980Pfs*2 | fs          | rs2066847        | 1 | IT* F<br>R*  | S  | PASH                   |

|                                |                   |             |       |                              |         |              |   |           |    |                   |
|--------------------------------|-------------------|-------------|-------|------------------------------|---------|--------------|---|-----------|----|-------------------|
| NOTCH1<br>(ENST00000651671)    | 146               | 9:136510652 | 17-18 | c.2740+1G>T                  | spl     | –            | 0 | AfUS      | –  | Keratoacanthoma   |
|                                | 147 <sup>on</sup> | 19:15197571 | 2     | p.C43Lfs*32                  | fs      | rs749829137  | 0 | FR*       | S  | –                 |
| NOTCH3<br>(ENST00000263388)    | 148               | 19:15192130 | 4     | p.H170R                      | mis     | rs147373451  | 0 | div.      | F  | –                 |
|                                | 149               | 19:15186898 | 12    | p.V644D                      | mis     | rs148046938  | 0 | div.      | F  | –                 |
| NOTCH2NLA<br>(ENST00000362074) | 150               | 1:146189383 | 1-2   | c.-44-2A>G                   | spl     | rs3872062    | 0 | div.      | F  | –                 |
|                                | 151               | X:129562396 | 11    | p.R318C                      | mis     | rs137853263  | 1 | IT*       | F  | DD2               |
| OCRL<br>(ENST00000371113)      | 152               | X:129569274 | 15    | p.R493W                      | mis     | rs137853846  | 1 | IT*       | –  | DD2               |
|                                | 153               | X:129569364 | 15    | p.D523N                      | mis     | –            | 1 | IT*       | F  | DD2               |
| OTULIN<br>(ENST00000284274)    | 154               | 5:14673698  | 2     | p.I70T                       | mis     | rs745829522  | 1 | IT*       | S  | PASH              |
|                                | 155°              | 5:14681484  | 4     | p.Q115H                      | mis     | rs147790160  | 1 | IT* FR*   | S  | PASH              |
| POFUT1<br>(ENST00000375749)    | 156               | 20:32216608 | 3-4   | c.430-1G>A                   | spl     | rs958172940  | 4 | ES*       | S  | DDD               |
|                                | 157               | 20:32230974 | 6     | p.W297*                      | non     | –            | 1 | ES*       | F  | DDD               |
| POGLUT1<br>(ENST00000295588)   | 158               | 3:119490567 | 9     | p.R272*                      | non     | rs747897279  | 1 | FR*       | F  | DDD               |
|                                | 159               | 15:76995150 | 5'    | c.-421CCTG [6]<br>[5to6-rep] | µsat    | rs55909412   | 0 | DE        | S  | PASH              |
|                                | 160               | 15:76995150 | 5'    | c.-421CCTG [8]<br>[5to8-rep] | µsat    | rs55909412   | 3 | TR RU FR* | FS | (PA)PASH,<br>PCAS |
|                                | 161               | 15:77032304 | 11    | p.E250Q                      | mis     | rs28939089   | 1 | DE*       | F  | PAPASH            |
|                                | 162               | 15:77032320 | 11    | p.T255M                      | mis     | rs766895096  | 1 | FI*       | –  | Diab PG UC        |
|                                | 163°              | 15:77032329 | 11    | p.G258A                      | mis     | rs34240327   | 0 | div. FR*  | S  | –                 |
|                                | 164               | 15:77032387 | 11    | p.E277D                      | mis     | rs990986006  | 5 | MD        | S  | PAPASH/FMF        |
| PSTPIP1<br>(ENST00000558012)   | 165               | 15:77032439 | 12-13 | c.838+45C>[AGT]              | int     | rs116895455  | 0 | SG        | FS | –                 |
|                                | 166               | 15:77035850 | 14    | p.Y345C                      | mis     | rs1192521928 | 3 | JP        | F  | PASH              |
|                                | 167°              | 15:77035928 | 14    | p.T371I                      | mis spl | rs34908107   | 0 | div. FR*  | FS | diverse           |
|                                | 168               | 15:77037018 | 14-15 | c.1120-27G>[AC]              | int     | rs766351379  | 0 | SG        | FS | –                 |
|                                | 169°              | 15:77037069 | 15    | p.A382T                      | mis     | rs145344175  | 0 | div. FR*  | FS | diverse           |
|                                | 170               | 15:77037133 | 15    | p.G403E                      | mis     | rs201572812  | 0 | div.      | FS | diverse           |
|                                | 171               | 15:77037138 | 15    | p.R405C                      | mis     | rs201253322  | 4 | div. ES*  | FS | PASH              |
|                                | 172               | 15:77037146 | 15    | p.F407L                      | mis     | rs200363654  | 0 | SG        | FS | –                 |

|                              |                   |             |   |               |     |              |   |              |    |                   |
|------------------------------|-------------------|-------------|---|---------------|-----|--------------|---|--------------|----|-------------------|
| PSMB8<br>(ENST00000374882)   | 173°              | 6:32843975  | 1 | p.G8R         | mis | rs114772012  | 0 | IT* F<br>R*  | S  | AS PASH SA<br>PHO |
| RORC<br>(ENST00000318247)    | 174°              | 1:151831737 | 1 | p.R10*        | non | rs17582155   | 0 | div. F<br>R* | F  | –                 |
| SLC46A2<br>(ENST00000374228) | 175               | 9:112890266 | 1 | p.A139Gfs*39  | fs  | –            | 0 | div.         | F  | –                 |
|                              | 176 <sup>ON</sup> | 9:112889705 | 1 | p.A326Gfs*133 | fs  | rs1841700210 | 0 | FR*          | S  | –                 |
| ~SOX9                        | 177               | 17:71515958 | – | g.71515958G>A | –   | rs10512572   | 0 | US*          | FS | diverse           |
| TCIRG1<br>(ENST00000265686)  | 178               | 11:68044207 | 9 | p.Q295*       | non | –            | 0 | div.         | F  | –                 |
| WDR1<br>(ENST00000499869)    | 179°              | 4:10087915  | 8 | p.H248R       | mis | rs41268387   | 1 | IT* F<br>R*  | S  | PASH/SAPHO        |

List of genes outside the  $\gamma$ -secretase complex: *AIM2* [14], *DCD* [15], *DEFB126* [16], *FGFR2* [17,18], *GJB2* [19–24], *IL1RN* [25], *IRF2BP2* [26], *KDF1* [27,28], *KRT6A* [29], *KRT17* [30,31], *MEFV* [17,24,25,32–34], *NBPF12* [16], *NF1P6* [16], *NLRC4* [24], *NLRP3* [25], *NOD2* [17,24,25,33], *NOTCH1* [35], *NOTCH3* [16,36], *NOTCH2NLA* [16], *OCRL* [37], *OTULIN* [24], *POFUT1* [38,39], *POGLUT1* [40], *PSTPIP1* [17,24,25,32,36,41–48], *PSMB8* [25], *RORC* [16], *SLC46A2* [16], *TCIRG1* [16], and *WDR1* [24]. Two variants were detected near *KLF5* and *SOX9* using GWAS approaches [123]. The lines with an (°) and in **bold** correspond to the above-mentioned variants (23) found in our HS cohorts. Those with an (N) are the new ones (2), not mentioned in the literature. Ex.: exons; Eff.: effect ( $\mu$ sat, fs, int, mis, non, and spl meaning respectively microsatellite, frameshift, intronic variant, missense, nonsense, and splice site variant); R.: number of studied reviews [13,59,78,88,100,114–119] (out of 11) citing this mutation; Or.: origin. The two-letter country code was used for the various studies (AM:Armenia; CN:China; DE:Germany; ES:Spain; FR:France; GB:United Kingdom; IT:Italy; JP:Japan; MD:Moldova; RU:Russia; SA:Saudi Arabia; SG:Singapour; TR:Turkey; US:United States and AfUS for African-American populations). When the code is followed by an asterisk (\*), it indicates that the population is not explicitly mentioned in the article, and the country is inferred based on the authors' affiliations ; F/S: familial and/or sporadic case. The last column lists the disease and/or syndrome associations mentioned in the articles — all acronyms are defined in Supplementary Figure 1.

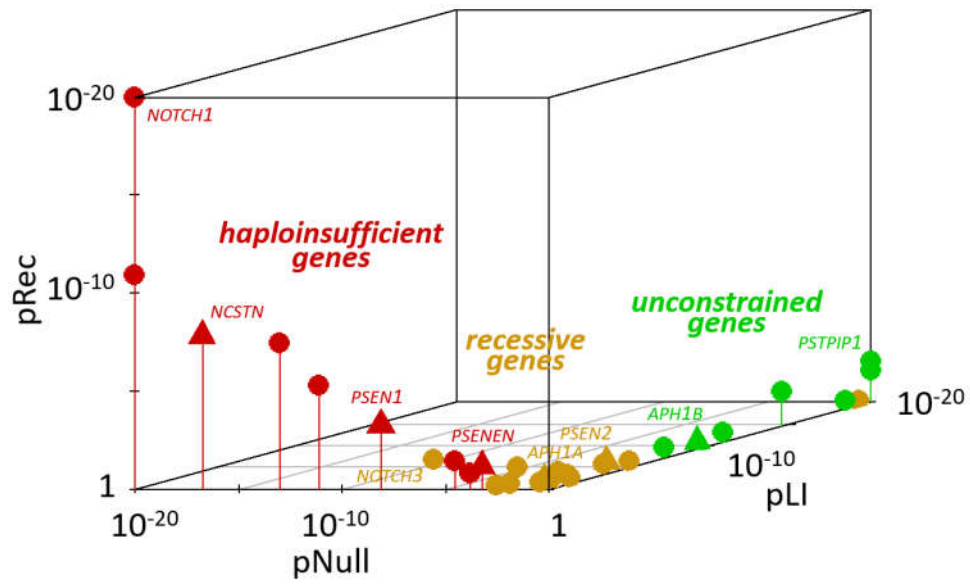

**Supplementary Figure 4.** Distribution of pLI (probability of intolerance to loss of function), pRec (probability of being recessive) and pNull (probability of being unconstrained) gene scores. Scores were obtained from the gnomAD (v4.1) database. Extreme values are capped to  $10^{-20}$  to enhance the readability of the figure. The triangles (▲) and circles (●) correspond to the genes of the  $\gamma$ -secretase complex and other genes mentioned in this review, respectively. From left to right, the genes subject to haploinsufficiency (in red) are: *NOTCH1*, *FGFR2*, *NCSTN*, *SOX9*, *RORC*, *PSEN1*, *KLF5*, *PSENEN*, and *KDF1*.
